# Supplementary material for: Global landscape of Streptococcus pneumoniae serotypes colonising healthy individuals worldwide before vaccine introduction; a systematic review and meta-analysis
Source: bioRxiv or medRxiv preprint supplement (doi:10.1101/2023.03.09.23287027), 2023-03-09
Supplement: Supplementary file [file media-1.pdf]

# Global landscape of Streptococcus pneumoniae serotypes colonising healthy individuals worldwide before vaccine introduction; a systematic review and meta-analysis

## Appendix 5

Samuel Clifford PhD<sup>1</sup>

Maria D Knoll PhD<sup>2</sup>

Katherine L O'Brien MD<sup>2</sup>

Timothy M Pollington PhD<sup>2</sup>

Riya Moodley MD<sup>1</sup>

RESPICAR Consortium (group)

W John Edmunds PhD<sup>1</sup>

Stefan Flasche PhD<sup>1</sup>

Olivier le Polain de Waroux PhD<sup>1</sup>

<sup>1</sup> Department of Infectious Disease Epidemiology, London School of Hygiene & Tropical Medicine, London, WC1E 7HT, UK

<sup>2</sup> Department of International Health, Johns Hopkins Bloomberg School of Public Health, Baltimore, 21205, US

Table 1: Datasets included in the RESPICAR systematic review. Design: CS - Cross-sectional; Long. - Longitudinal; Unkn. - Unknown design. Sampling strategy: Rand. - Random/community; Outp. - Outpatients; Trial - Trial arm

| First author (date) | Reference                                                                                                                                                                                                                                                  | Year started | Country          | ISO 3166-1 | Continent | Design | Sampling strategy | Ethnic Minority | Age group | Age range (years) | Median age (years) | # Positive | # Total | Prevalence |
|---------------------|------------------------------------------------------------------------------------------------------------------------------------------------------------------------------------------------------------------------------------------------------------|--------------|------------------|------------|-----------|--------|-------------------|-----------------|-----------|-------------------|--------------------|------------|---------|------------|
| Adetifa (2012)      | Pre-vaccination nasopharyngeal pneumococcal carriage in a Nigerian population: epidemiology and population biology. PLOS ONE 7 (1)                                                                                                                         | 2010         | Nigeria          | 566        | Africa    | CS     | Rand.             | No              | <5y       | 0–4               | Unknown            | 375        | 524     | 72%        |
|                     |                                                                                                                                                                                                                                                            | 2010         | Nigeria          | 566        | Africa    | CS     | Rand.             | No              | 5–17y     | 5–14              | Unknown            | 63         | 120     | 52%        |
|                     |                                                                                                                                                                                                                                                            | 2010         | Nigeria          | 566        | Africa    | CS     | Rand.             | No              | 18+y      | ≥18               | Unknown            | 90         | 361     | 25%        |
| Aho (2016)          | Limited impact of neonatal or early infant schedules of 7-valent pneumococcal conjugate vaccination on nasopharyngeal carriage of Streptococcus pneumoniae in Papua New Guinean children: a randomized controlled trial. Vaccine Reports 6                 | 2005         | Papua New Guinea | 598        | Oceania   | Long.  | Rand.             | No              | <5y       | <1                | 0                  | 62         | 79      | 78%        |
| Al-Lahham (2009)    | Resistance Patterns and Risk Factors of Streptococcus pneumoniae Carriage in Healthy Jordanian Children. Abstracts of the Interscience Conference on Antimicrobial Agents and Chemotherapy 49 (C2-1396)                                                    | 2009         | Jordan           | 400        | Asia      | CS     | Outp.             | No              | <5y       | 0–4               | Unknown            | 65         | 118     | 55%        |
| Altuzarra (2007)    | Nasal carriage of Streptococcus pneumoniae in elderly subjects according to vaccination status. Spanish Portacion nasal de Streptococcus pneumoniae en adulto mayor y su respuesta frente a la vacunacion antineumococica. Revista Medica de Chile 135 (2) | 1998         | Chile            | 152        | Americas  | CS     | Unkn.             | No              | 18+y      | 60–60             | Unknown            | 19         | 118     | 16%        |
| Amaro (2018)        | Prevalence of naso-pharyngeal Pneumococcal colonization in children between 1 to 5 years old in pre-school educative centers. 2014-2015. Medisur-Revista De Ciencias Medicas De Cienfuegos 16 (3)                                                          | 2014         | Cuba             | 192        | Americas  | CS     | Unkn.             | No              | <5y       | 1–5               | 3                  | 356        | 1129    | 32%        |
| Andrade (2010)      | Survey of nonsusceptible nasopharyngeal streptococcus pneumoniae isolates in children attending day-care centers in Brazil. Pediatric Infectious Disease Journal 29                                                                                        | 2005         | Brazil           | 76         | Americas  | CS     | Unkn.             | No              | <5y       | <1                | 0                  | 6          | 20      | 30%        |
|                     |                                                                                                                                                                                                                                                            | 2005         | Brazil           | 76         | Americas  | CS     | Unkn.             | No              | <5y       | 1–1               | 1                  | 80         | 190     | 42%        |
|                     |                                                                                                                                                                                                                                                            | 2005         | Brazil           | 76         | Americas  | CS     | Unkn.             | No              | <5y       | 2–4               | 3                  | 244        | 979     | 25%        |
|                     |                                                                                                                                                                                                                                                            | 2008         | Brazil           | 76         | Americas  | CS     | Unkn.             | No              | <5y       | <1                | 0                  | 3          | 7       | 43%        |

|                        |                                                                                                                                                                                                                                                    |      |                |     |          |       |       |    |       |       |         |     |      |       |
|------------------------|----------------------------------------------------------------------------------------------------------------------------------------------------------------------------------------------------------------------------------------------------|------|----------------|-----|----------|-------|-------|----|-------|-------|---------|-----|------|-------|
| Andrade (2012)         | Molecular epidemiological investigation to determine the source of a fatal case of serotype 22F pneumococcal meningitis. <i>Journal of Medical Microbiology</i> 61                                                                                 | 2008 | Brazil         | 76  | Americas | CS    | Unkn. | No | <5y   | 1–1   | 1       | 4   | 7    | 57%   |
|                        |                                                                                                                                                                                                                                                    | 2008 | Brazil         | 76  | Americas | CS    | Unkn. | No | <5y   | 2–4   | 3       | 61  | 102  | 60%   |
| Appelbaum (1996)       | Carriage of antibiotic-resistant <i>Streptococcus pneumoniae</i> by children in eastern and central Europe—a multicenter study with use of standardized methods. <i>Clinical Infectious Diseases</i> 23                                            | 1993 | Cyprus         | 196 | Asia     | CS    | Outp. | No | <5y   | 0–4   | Unknown | 12  | 100  | 12%   |
|                        |                                                                                                                                                                                                                                                    | 1993 | Bulgaria       | 100 | Europe   | CS    | Outp. | No | <5y   | 0–4   | Unknown | 35  | 216  | 16%   |
|                        |                                                                                                                                                                                                                                                    | 1993 | Poland         | 616 | Europe   | CS    | Outp. | No | <5y   | 0–4   | Unknown | 42  | 69   | 61%   |
|                        |                                                                                                                                                                                                                                                    | 1993 | Romania        | 642 | Europe   | CS    | Outp. | No | <5y   | 0–4   | Unknown | 5   | 100  | 5%    |
|                        |                                                                                                                                                                                                                                                    | 1993 | Russia         | 643 | Europe   | CS    | Outp. | No | <5y   | 0–4   | Unknown | 61  | 253  | 24%   |
|                        |                                                                                                                                                                                                                                                    | 1993 | Slovakia       | 703 | Europe   | CS    | Outp. | No | <5y   | 0–4   | Unknown | 103 | 216  | 48%   |
| Arason (1996)          | Do antimicrobials increase the carriage rate of penicillin resistant pneumococci in children? Cross sectional prevalence study. <i>British Medical Journal</i> 313 (7054)                                                                          | 1992 | Iceland        | 352 | Europe   | CS    | Outp. | No | <5y   | 0–6   | Unknown |     |      | Unkn. |
| Aslan (2007)           | Serotype distribution of <i>Streptococcus pneumoniae</i> strains in the nasopharynx of healthy Turkish children. <i>Indian Journal of Medical Research</i> 125 (4)                                                                                 | 2003 | Turkey         | 792 | Asia     | CS    | Unkn. | No | 5–17y | 6–13  | 9       | 201 | 1440 | 14%   |
| Auranen (2010)         | Between-strain competition in acquisition and clearance of pneumococcal carriage—epidemiologic evidence from a longitudinal study of day-care children. <i>American Journal of Epidemiology</i> 171                                                | 1999 | Denmark        | 208 | Europe   | Long. | Unkn. | No | <5y   | 0–3   | 2       | 423 | 571  | 74%   |
|                        |                                                                                                                                                                                                                                                    | 1999 | Denmark        | 208 | Europe   | Long. | Unkn. | No | 18+y  | ≥18   | Unknown | 35  | 161  | 22%   |
| Badawy (2017)          | Serotypes of <i>Streptococcus pneumoniae</i> in Egyptian children: are they covered by pneumococcal conjugate vaccines?. <i>European Journal of Clinical Microbiology and Infectious Diseases</i> 36 (12)                                          | 2012 | Egypt          | 818 | Africa   | CS    | Outp. | No | <5y   | 0–5   | 2       | 62  | 200  | 31%   |
| Bae (2013)             | Prevalent Multidrug-resistant Nonvaccine Serotypes in Pneumococcal Carriage of Healthy Korean Children Associated with the Low Coverage of the Seven-valent Pneumococcal Conjugate Vaccine. <i>Osong Public Health and Research Perspectives</i> 4 | 2006 | South Korea    | 410 | Asia     | Long. | Unkn. | No | 5–17y | 6–10  | 8       | 155 | 1668 | 11%   |
| Balicer (2010)         | Control of <i>Streptococcus pneumoniae</i> serotype 5 epidemic of severe pneumonia among young army recruits by mass antibiotic treatment and vaccination. <i>Vaccine</i> 28 (34)                                                                  | 2005 | Israel         | 376 | Asia     | CS    | Unkn. | No | 18+y  | 18–20 | 18      | 58  | 142  | 41%   |
| Bayraktar (2005)       | Nasopharyngeal carriage of <i>Streptococcus pneumoniae</i> in healthy children attending day care centres in Malatya. <i>Infeksiyon Dergisi. Turkish Journal of Infection</i> 19 (3)                                                               | 2003 | Turkey         | 792 | Asia     | CS    | Unkn. | No | 5–17y | 7–13  | Unknown | 162 | 848  | 19%   |
| Berezin (2012)         | Pneumococcal nasopharyngeal carriage in infants of mothers immunized with 23V non-conjugate pneumococcal polysaccharide vaccine. <i>Journal of Tropical Pediatrics</i> 58                                                                          | 2005 | Brazil         | 76  | Americas | CS    | Outp. | No | <5y   | <1    | Unknown | 31  | 139  | 22%   |
| Berkovitch (2002)      | Colonization rate of bacteria in the throat of healthy infants. <i>International Journal of Pediatric Otorhinolaryngology</i> 63                                                                                                                   | 2000 | Israel         | 376 | Asia     | CS    | Outp. | No | <5y   | 0–1   | 1       | 23  | 1000 | 2%    |
| Blossom (2007)         | Characterization of penicillin intermediate serotypes of <i>Streptococcus pneumoniae</i> carried by human immunodeficiency virus-infected adults and healthy children in Uganda. <i>Microbial Drug Resistance</i> 13                               | 2004 | Uganda         | 800 | Africa   | CS    | Outp. | No | <5y   | 0–2   | Unknown | 113 |      | Unkn. |
| Bogaert (2001)         | Pneumococcal carriage in children in The Netherlands: a molecular epidemiological study. <i>Journal of Clinical Microbiology</i> 39                                                                                                                | 1999 | Netherlands    | 528 | Europe   | CS    | Rand. | No | <5y   | 0–3   | 1       | 305 |      | Unkn. |
| Bokaeian (2011)        | Nasopharyngeal carriage, antibiotic resistance and serotype distribution of <i>Streptococcus pneumoniae</i> among healthy adolescents in Zahedan. <i>Iranian Red Crescent Medical Journal</i> 13 (5)                                               | 2007 | Iran           | 364 | Asia     | CS    | Unkn. | No | 5–17y | 10–19 | Unknown | 136 | 865  | 16%   |
| Boken (1995)           | Colonization with penicillin-resistant <i>Streptococcus pneumoniae</i> in a child-care center. <i>Pediatric Infectious Disease Journal</i> 14 (10)                                                                                                 | 1994 | United States  | 840 | Americas | CS    | Unkn. | No | <5y   | 1–2   | Unknown | 32  | 54   | 59%   |
| Boken (1996)           | Colonization with penicillin-nonsusceptible <i>Streptococcus pneumoniae</i> in urban and rural child-care centers. <i>Pediatric Infectious Disease Journal</i> 15 (8)                                                                              | 1990 | United States  | 840 | Americas | CS    | Unkn. | No | <5y   | 0–1   | 1       | 121 | 215  | 56%   |
| Browall (2014)         | Intraclonal variations among <i>Streptococcus pneumoniae</i> isolates influence the likelihood of invasive disease in children. <i>Journal of Infectious Diseases</i> 209 (3)                                                                      | 1997 | Sweden         | 752 | Europe   | CS    | Unkn. | No | <5y   | <1    | Unknown | 55  | 550  | 10%   |
| Brueggemann (2003)     | Clonal relationships between invasive and carriage <i>Streptococcus pneumoniae</i> and serotype- and clone-specific differences in invasive disease potential. <i>Journal of Infectious Diseases</i> 187                                           | 1994 | United Kingdom | 826 | Europe   | Long. | Rand. | No | <5y   | 0–4   | Unknown |     |      | Unkn. |
| Calderón-Jaimes (1993) | The resistance and serotyping of 83 strains of <i>Streptococcus pneumoniae</i> isolated from asymptomatic carriers and ill children. <i>Boletín Médico del Hospital Infantil de México</i> 50 (12)                                                 | 1992 | Mexico         | 484 | Americas | CS    | Unkn. | No | <5y   | 2–5   | Unknown | 35  | 44   | 80%   |
| Camurdan (2008)        | Nasopharyngeal carriage of <i>Streptococcus pneumoniae</i> in healthy Turkish infants. <i>Journal of Infection</i> 56                                                                                                                              | 2003 | Turkey         | 792 | Asia     | CS    | Outp. | No | <5y   | 1–2   | 1       | 127 | 564  | 23%   |

|                           |                                                                                                                                                                                                                                                                                            |      |               |     |          |       |       |     |       |       |         |     |      |     |
|---------------------------|--------------------------------------------------------------------------------------------------------------------------------------------------------------------------------------------------------------------------------------------------------------------------------------------|------|---------------|-----|----------|-------|-------|-----|-------|-------|---------|-----|------|-----|
| Cardozo (2006)            | Antimicrobial resistance and serotypes of nasopharyngeal strains of Streptococcus pneumoniae in Brazilian adolescents. Microbial Drug Resistance 12 (1)                                                                                                                                    | 2003 | Brazil        | 76  | Americas | CS    | Unkn. | No  | 5–17y | 10–19 | Unknown | 83  | 1013 | 8%  |
| Caugant (2006)            | Carriage of Streptococcus pneumoniae in healthy Norwegian children attending day-care centres. European Journal of Clinical Microbiology and Infectious Diseases 25                                                                                                                        | 2003 | Norway        | 578 | Europe   | Long. | Unkn. | No  | <5y   | 1–1   | 1       | 6   | 10   | 60% |
|                           |                                                                                                                                                                                                                                                                                            | 2003 | Norway        | 578 | Europe   | Long. | Unkn. | No  | <5y   | 1–1   | 1       | 27  | 46   | 59% |
|                           |                                                                                                                                                                                                                                                                                            | 2003 | Norway        | 578 | Europe   | Long. | Unkn. | No  | <5y   | 2–4   | Unknown | 5   | 8    | 62% |
|                           |                                                                                                                                                                                                                                                                                            | 2003 | Norway        | 578 | Europe   | Long. | Unkn. | No  | <5y   | 2–4   | Unknown | 9   | 23   | 39% |
|                           |                                                                                                                                                                                                                                                                                            | 2003 | Norway        | 578 | Europe   | Long. | Unkn. | No  | 5–17y | 5–6   | Unknown | 6   | 16   | 38% |
|                           |                                                                                                                                                                                                                                                                                            | 2003 | Norway        | 578 | Europe   | Long. | Unkn. | No  | 5–17y | 5–6   | Unknown | 7   | 24   | 29% |
|                           |                                                                                                                                                                                                                                                                                            | 2003 | Norway        | 578 | Europe   | Long. | Unkn. | No  | <5y   | 1–1   | 1       | 33  | 56   | 59% |
|                           |                                                                                                                                                                                                                                                                                            | 2003 | Norway        | 578 | Europe   | Long. | Unkn. | No  | <5y   | 2–4   | Unknown | 14  | 31   | 45% |
|                           |                                                                                                                                                                                                                                                                                            | 2003 | Norway        | 578 | Europe   | Long. | Unkn. | No  | 5–17y | 5–6   | Unknown | 13  | 40   | 32% |
|                           |                                                                                                                                                                                                                                                                                            | 2004 | Norway        | 578 | Europe   | Long. | Unkn. | No  | <5y   | 1–1   | Unknown | 6   | 11   | 55% |
| Caugant (2010)            | Impact of a pneumococcal conjugate vaccination program on carriage among children in Norway. Clinical and Vaccine Immunology 17                                                                                                                                                            | 2004 | Norway        | 578 | Europe   | Long. | Unkn. | No  | <5y   | 2–4   | Unknown | 2   | 9    | 22% |
|                           |                                                                                                                                                                                                                                                                                            | 2004 | Norway        | 578 | Europe   | Long. | Unkn. | No  | 5–17y | 5–6   | Unknown | 5   | 16   | 31% |
|                           |                                                                                                                                                                                                                                                                                            | 2006 | Norway        | 578 | Europe   | CS    | Unkn. | No  | <5y   | <1    | Unknown | 2   | 3    | 67% |
|                           |                                                                                                                                                                                                                                                                                            | 2006 | Norway        | 578 | Europe   | CS    | Unkn. | No  | <5y   | 1–1   | Unknown | 48  | 55   | 87% |
| Cekmez (2009)             | Pneumococcal serotypes recovered from health children and their possible association with risk factor in Istanbul, Turkey. International Journal of Biomedical Science 5 (2)                                                                                                               | 2006 | Norway        | 578 | Europe   | CS    | Unkn. | No  | <5y   | 2–4   | Unknown | 325 | 409  | 79% |
|                           |                                                                                                                                                                                                                                                                                            | 2006 | Norway        | 578 | Europe   | CS    | Unkn. | No  | <5y   | 5–5   | 5       | 74  | 106  | 70% |
|                           |                                                                                                                                                                                                                                                                                            | 2007 | Turkey        | 792 | Asia     | CS    | Outp. | No  | 5–17y | 4–6   | Unknown | 9   | 125  | 7%  |
| Charveriat (2005)         | Nasopharyngeal carriage of Streptococcus pneumoniae in healthy children, 2 to 24 months of age, in New-Caledonia. French Etude du portage rhinopharyngé de Streptococcus pneumoniae chez les enfants sains ages de 2 a 24 mois en Nouvelle-Caledonie. Medecine et Maladies Infectieuses 35 | 2002 | New Caledonia | 540 | Oceania  | CS    | Outp. | No  | <5y   | 0–1   | 1       | 544 | 1040 | 52% |
| Cherian (1999)            | Nasopharyngeal colonization of infants in southern India with Streptococcus pneumoniae. Epidemiology and Infection 123                                                                                                                                                                     | 1994 | India         | 356 | Asia     | Long. | Outp. | No  | <5y   | 0–1   | 0       | 202 | 506  | 40% |
|                           |                                                                                                                                                                                                                                                                                            | 2003 | Gambia        | 270 | Africa   | CS    | Trial | No  | <5y   | 0–1   | 1       | 996 | 1061 | 94% |
| Cheung (2009)             | Nasopharyngeal carriage of Streptococcus pneumoniae in Gambian children who participated in a 9-valent pneumococcal conjugate vaccine trial and in their younger siblings. Pediatric Infectious Disease Journal 28                                                                         | 2003 | Gambia        | 270 | Africa   | CS    | Trial | No  | <5y   | 1–3   | 1       | 910 | 961  | 95% |
|                           |                                                                                                                                                                                                                                                                                            | 2004 | Gambia        | 270 | Africa   | CS    | Trial | No  | <5y   | <1    | 0       | 305 | 329  | 93% |
|                           |                                                                                                                                                                                                                                                                                            | 1998 | India         | 356 | Asia     | Long. | Rand. | No  | <5y   | <1    | 0       | 247 | 352  | 70% |
| Coles (2002)              | Nasopharyngeal carriage of resistant pneumococci in young South Indian infants. Epidemiology and Infection 129                                                                                                                                                                             | 1998 | India         | 356 | Asia     | Long. | Rand. | No  | <5y   | <1    | 0       | 259 | 404  | 64% |
|                           |                                                                                                                                                                                                                                                                                            | 1998 | India         | 356 | Asia     | Long. | Rand. | No  | <5y   | <1    | 0       | 183 | 462  | 40% |
|                           |                                                                                                                                                                                                                                                                                            | 2003 | Nepal         | 524 | Asia     | CS    | Rand. | No  | <5y   | <1    | 0       | 118 | 149  | 79% |
| Coles (2009)              | Nasopharyngeal carriage of S-pneumoniae among young children in rural Nepal. Tropical Medicine and International Health 14                                                                                                                                                                 | 2003 | Nepal         | 524 | Asia     | CS    | Rand. | No  | <5y   | 1–1   | 1       | 249 | 300  | 83% |
|                           |                                                                                                                                                                                                                                                                                            | 2003 | Nepal         | 524 | Asia     | CS    | Rand. | No  | <5y   | 2–4   | 3       | 84  | 101  | 83% |
|                           |                                                                                                                                                                                                                                                                                            | 2004 | Bangladesh    | 50  | Asia     | CS    | Rand. | No  | <5y   | <1    | 0       | 354 | 500  | 71% |
| Conklin (2016)            | High Streptococcus pneumoniae colonization prevalence among HIV-infected Kenyan parents in the year before pneumococcal conjugate vaccine introduction. BMC Infectious Diseases 16                                                                                                         | 2009 | Kenya         | 404 | Africa   | CS    | Unkn. | No  | 18+y  | 30–40 | Unknown | 41  | 153  | 27% |
| da Gloria Carvalho (2013) | Non-pneumococcal mitis-group streptococci confound detection of pneumococcal capsular serotype-specific loci in upper respiratory tract. PeerJ 1 (e97)                                                                                                                                     | 2009 | Kenya         | 404 | Africa   | CS    | Outp. | No  | <5y   | 0–4   | Unknown | 202 | 237  | 85% |
|                           |                                                                                                                                                                                                                                                                                            | 2009 | Kenya         | 404 | Africa   | CS    | Outp. | No  | 18+y  | ≥18   | Unknown | 5   | 40   | 12% |
|                           |                                                                                                                                                                                                                                                                                            | 2009 | Israel        | 376 | Asia     | CS    | Outp. | Yes | <5y   | <1    | Unknown | 23  | 84   | 27% |
|                           |                                                                                                                                                                                                                                                                                            | 2009 | Israel        | 376 | Asia     | CS    | Outp. | Yes | <5y   | 1–1   | Unknown | 29  | 83   | 35% |

|                     |                                                                                                                                                                                                                                                                             |      |                         |     |        |       |       |     |         |     |         |     |     |     |
|---------------------|-----------------------------------------------------------------------------------------------------------------------------------------------------------------------------------------------------------------------------------------------------------------------------|------|-------------------------|-----|--------|-------|-------|-----|---------|-----|---------|-----|-----|-----|
| Daana (2015)        | Measuring the effects of pneumococcal conjugate vaccine (PCV7) on Streptococcus pneumoniae carriage and antibiotic resistance: The Palestinian-Israeli Collaborative Research (PICR). Vaccine 33 (8)                                                                        | 2009 | Israel                  | 376 | Asia   | CS    | Outp. | Yes | <5y     | 2-4 | Unknown | 49  | 180 | 27% |
|                     |                                                                                                                                                                                                                                                                             | 2009 | Palestinian Territories | 275 | Asia   | CS    | Outp. | Yes | <5y     | <1  | Unknown | 100 | 270 | 37% |
|                     |                                                                                                                                                                                                                                                                             | 2009 | Palestinian Territories | 275 | Asia   | CS    | Outp. | Yes | <5y     | 1-1 | Unknown | 65  | 165 | 39% |
|                     |                                                                                                                                                                                                                                                                             | 2009 | Palestinian Territories | 275 | Asia   | CS    | Outp. | Yes | <5y     | 2-4 | Unknown | 58  | 186 | 31% |
| Dagan (2005)        | Serum serotype-specific pneumococcal anticapsular immunoglobulin G concentrations after immunization with a 9-valent conjugate pneumococcal vaccine correlate with nasopharyngeal acquisition of pneumococcus. Journal of Infectious Diseases 192 (3)                       | 1996 | Israel                  | 376 | Asia   | Long. | Unkn. | No  | <5y     | 2-4 | 2       | 284 | 367 | 77% |
| Dagan (2010)        | Nasopharyngeal Carriage of Streptococcus pneumoniae Shortly before Vaccination with a Pneumococcal Conjugate Vaccine Causes Serotype-Specific Hyporesponsiveness in Early Infancy. Journal of Infectious Diseases 201                                                       | 2005 | Israel                  | 376 | Asia   | CS    | Trial | No  | <5y     | <1  | Unknown | 204 | 459 | 44% |
| Dagan (2012)        | The effect of an alternative reduced-dose infant schedule and a second year catch-up schedule with 7-valent pneumococcal conjugate vaccine on pneumococcal carriage: a randomized controlled trial. Vaccine 30                                                              | 2005 | Israel                  | 376 | Asia   | Long. | Trial | No  | <5y     | <1  | Unknown | 33  | 95  | 35% |
|                     |                                                                                                                                                                                                                                                                             | 2005 | Israel                  | 376 | Asia   | Long. | Trial | No  | <5y     | <1  | Unknown | 35  | 97  | 36% |
|                     |                                                                                                                                                                                                                                                                             | 2005 | Israel                  | 376 | Asia   | Long. | Trial | No  | <5y     | <1  | 0       | 18  | 98  | 18% |
|                     |                                                                                                                                                                                                                                                                             | 2005 | Israel                  | 376 | Asia   | Long. | Trial | No  | <5y     | <1  | Unknown | 42  | 92  | 46% |
|                     |                                                                                                                                                                                                                                                                             | 2005 | Israel                  | 376 | Asia   | Long. | Trial | No  | <5y     | <1  | Unknown | 62  | 79  | 78% |
|                     |                                                                                                                                                                                                                                                                             | 2005 | Israel                  | 376 | Asia   | Long. | Trial | No  | <5y     | <1  | Unknown | 60  | 78  | 77% |
|                     |                                                                                                                                                                                                                                                                             | 2005 | Israel                  | 376 | Asia   | Long. | Trial | No  | <5y     | <1  | 0       | 53  | 87  | 61% |
|                     |                                                                                                                                                                                                                                                                             | 2005 | Israel                  | 376 | Asia   | Long. | Trial | No  | <5y     | <1  | Unknown | 56  | 79  | 71% |
|                     |                                                                                                                                                                                                                                                                             | 2005 | Israel                  | 376 | Asia   | Long. | Trial | No  | <5y     | 1-1 | 1       | 45  | 91  | 49% |
|                     |                                                                                                                                                                                                                                                                             | 2005 | Israel                  | 376 | Asia   | Long. | Trial | No  | <5y     | 1-1 | 1       | 55  | 78  | 71% |
| Darboe (2010)       | The dynamics of nasopharyngeal streptococcus pneumoniae carriage among rural Gambian mother-infant pairs. BMC Infectious Diseases 10                                                                                                                                        | 2001 | Gambia                  | 270 | Africa | Long. | Rand. | No  | <5y     | <1  | Unknown | 169 | 196 | 86% |
|                     |                                                                                                                                                                                                                                                                             | 2001 | Gambia                  | 270 | Africa | Long. | Rand. | No  | <5y     | 1-1 | 1       | 182 | 196 | 93% |
|                     |                                                                                                                                                                                                                                                                             | 2001 | Gambia                  | 270 | Africa | Long. | Rand. | No  | 18+y    | ≥18 | Unknown | 43  | 196 | 22% |
|                     |                                                                                                                                                                                                                                                                             | 2001 | Gambia                  | 270 | Africa | Long. | Rand. | No  | 18+y    | ≥18 | Unknown | 45  | 196 | 23% |
| de Lencastre (1999) | Carriage and antibiotic resistance of respiratory pathogens and molecular epidemiology of antibiotic-resistant Streptococcus pneumoniae colonizing children in day-care centers in Lisbon: The Portuguese day-care center initiative. Clinical Microbiology and Infection 5 | 1996 | Portugal                | 620 | Europe | CS    | Unkn. | No  | <5y     | <1  | 0       | 9   | 20  | 45% |
|                     |                                                                                                                                                                                                                                                                             | 1996 | Portugal                | 620 | Europe | CS    | Unkn. | No  | <5y     | 1-1 | 1       | 34  | 46  | 74% |
|                     |                                                                                                                                                                                                                                                                             | 1996 | Portugal                | 620 | Europe | CS    | Unkn. | No  | <5y     | 2-4 | Unknown | 147 | 303 | 49% |
|                     |                                                                                                                                                                                                                                                                             | 1996 | Portugal                | 620 | Europe | CS    | Unkn. | No  | 5-17y   | 5-6 | 5       | 84  | 217 | 39% |
|                     |                                                                                                                                                                                                                                                                             | 1997 | Portugal                | 620 | Europe | CS    | Unkn. | No  | <5y     | <1  | Unknown | 15  | 29  | 52% |
|                     |                                                                                                                                                                                                                                                                             | 1997 | Portugal                | 620 | Europe | CS    | Unkn. | No  | <5y     | 1-1 | 1       | 42  | 65  | 65% |
|                     |                                                                                                                                                                                                                                                                             | 1997 | Portugal                | 620 | Europe | CS    | Unkn. | No  | <5y     | 2-4 | Unknown | 200 | 414 | 48% |
|                     |                                                                                                                                                                                                                                                                             | 1997 | Portugal                | 620 | Europe | CS    | Unkn. | No  | 5-17y   | 5-6 | 5       | 92  | 237 | 39% |
|                     |                                                                                                                                                                                                                                                                             | 1998 | Portugal                | 620 | Europe | CS    | Unkn. | No  | <5y     | <1  | 0       | 22  | 31  | 71% |
|                     |                                                                                                                                                                                                                                                                             | 1998 | Portugal                | 620 | Europe | CS    | Unkn. | No  | <5y     | 1-1 | 1       | 50  | 80  | 62% |
|                     |                                                                                                                                                                                                                                                                             | 1998 | Portugal                | 620 | Europe | CS    | Unkn. | No  | <5y     | 2-4 | Unknown | 242 | 398 | 61% |
|                     |                                                                                                                                                                                                                                                                             | 1998 | Portugal                | 620 | Europe | CS    | Unkn. | No  | 5-17y   | 5-6 | 5       | 139 | 271 | 51% |
|                     |                                                                                                                                                                                                                                                                             | 1999 | Portugal                | 620 | Europe | CS    | Unkn. | No  | <5y     | <1  | Unknown | 26  | 43  | 60% |
| 1999                | Portugal                                                                                                                                                                                                                                                                    | 620  | Europe                  | CS  | Unkn.  | No    | <5y   | 1-1 | Unknown | 74  | 109     | 68% |     |     |

|                                 |                                                                                                                                                                                                                                                                                                                 |      |                |     |          |       |       |     |         |       |         |     |      |     |
|---------------------------------|-----------------------------------------------------------------------------------------------------------------------------------------------------------------------------------------------------------------------------------------------------------------------------------------------------------------|------|----------------|-----|----------|-------|-------|-----|---------|-------|---------|-----|------|-----|
| de Lencastre (2005)             | Trends in drug resistance, serotypes, and molecular types of <i>Streptococcus pneumoniae</i> colonizing preschool-age children attending day care centers in Lisbon, Portugal: A summary of 4 years of annual surveillance. <i>Journal of Clinical Microbiology</i> 43                                          | 1999 | Portugal       | 620 | Europe   | CS    | Unkn. | No  | <5y     | 2–4   | Unknown | 335 | 528  | 63% |
|                                 |                                                                                                                                                                                                                                                                                                                 | 1999 | Portugal       | 620 | Europe   | CS    | Unkn. | No  | 5–17y   | 5–6   | 5       | 155 | 254  | 61% |
| de Miguel-Martinez (2008)       | Efficacy of heptavalent pneumococcal conjugate vaccine in children with cochlear implant. <i>Acta Otorrinolaringologica Espanola</i> 59                                                                                                                                                                         | 2005 | Spain          | 724 | Europe   | CS    | Unkn. | No  | <5y     | 2–5   | 3       | 15  | 60   | 25% |
|                                 |                                                                                                                                                                                                                                                                                                                 | 2005 | Spain          | 724 | Europe   | CS    | Unkn. | No  | <5y     | 2–5   | 3       | 15  | 60   | 25% |
| de Waard (2007)                 | Pneumococcal carriage among indigenous Warao children in Venezuela: serotypes, susceptibility patterns, and molecular epidemiology. <i>Clinical Infectious Diseases</i> 45                                                                                                                                      | 2000 | Venezuela      | 862 | Americas | CS    | Rand. | Yes | <5y     | 1–2   | 2       | 72  | 140  | 51% |
|                                 |                                                                                                                                                                                                                                                                                                                 | 2004 | Venezuela      | 862 | Americas | CS    | Rand. | Yes | <5y     | <1    | 0       | 24  | 57   | 42% |
|                                 |                                                                                                                                                                                                                                                                                                                 | 2004 | Venezuela      | 862 | Americas | CS    | Rand. | Yes | <5y     | 3–4   | 3       | 51  | 115  | 44% |
|                                 |                                                                                                                                                                                                                                                                                                                 | 2004 | Venezuela      | 862 | Americas | CS    | Rand. | Yes | <5y     | 5–5   | 5       | 14  | 44   | 32% |
| de Waard (2010)                 | Pneumococcal carriage in mothers and children of the panare amerindians from the state of Bolivar, Venezuela. Spanish Estado de portador nasofaringeo de streptococcus pneumoniae en madres e hijos de la poblacion indigena panare del estado Bolivar, Venezuela. <i>Revista Argentina de Microbiologia</i> 42 | 2008 | Venezuela      | 862 | Americas | CS    | Rand. | Yes | <5y     | 1–2   | Unknown | 21  | 27   | 78% |
|                                 |                                                                                                                                                                                                                                                                                                                 | 2008 | Venezuela      | 862 | Americas | CS    | Rand. | Yes | <5y     | 3–4   | Unknown | 30  | 46   | 65% |
|                                 |                                                                                                                                                                                                                                                                                                                 | 2008 | Venezuela      | 862 | Americas | CS    | Rand. | Yes | 18+y    | 18–40 | Unknown | 7   | 64   | 11% |
| de Waard (2011)                 | Carriage and invasive isolates of <i>Streptococcus pneumoniae</i> in Caracas, Venezuela: The relative invasiveness of serotypes and vaccine coverage. <i>European Journal of Clinical Microbiology and Infectious Diseases</i> 30                                                                               | 2007 | Venezuela      | 862 | Americas | CS    | Outp. | No  | <5y     | 0–3   | Unknown | 182 | 894  | 20% |
| Dunais (2011)                   | A decade-long surveillance of nasopharyngeal colonisation with <i>Streptococcus pneumoniae</i> among children attending day-care centres in south-eastern France: 1999-2008. <i>European Journal of Clinical Microbiology and Infectious Diseases</i> 30                                                        | 1999 | France         | 250 | Europe   | CS    | Unkn. | No  | <5y     | <1    | 0       | 25  | 44   | 57% |
|                                 |                                                                                                                                                                                                                                                                                                                 | 1999 | France         | 250 | Europe   | CS    | Unkn. | No  | <5y     | 1–1   | 1       | 76  | 123  | 62% |
|                                 |                                                                                                                                                                                                                                                                                                                 | 1999 | France         | 250 | Europe   | CS    | Unkn. | No  | <5y     | 2–4   | Unknown | 60  | 131  | 46% |
|                                 |                                                                                                                                                                                                                                                                                                                 | 2002 | France         | 250 | Europe   | CS    | Unkn. | No  | <5y     | <1    | 0       | 33  | 57   | 58% |
|                                 |                                                                                                                                                                                                                                                                                                                 | 2002 | France         | 250 | Europe   | CS    | Unkn. | No  | <5y     | 1–1   | 1       | 67  | 115  | 58% |
| 2002                            | France                                                                                                                                                                                                                                                                                                          | 250  | Europe         | CS  | Unkn.    | No    | <5y   | 2–4 | Unknown | 72    | 122     | 59% |      |     |
| Dunne (2018)                    | Carriage of streptococcus pneumoniae, haemophilus influenzae, moraxella catarrhalis, and staphylococcus aureus in Indonesian children: A cross-sectional study. <i>PLOS ONE</i> 13 (4)                                                                                                                          | 2016 | Indonesia      | 360 | Asia     | CS    | Rand. | No  | <5y     | 1–2   | Unknown | 147 | 302  | 49% |
| Egere (2012)                    | Indirect effect of 7-valent pneumococcal conjugate vaccine on pneumococcal carriage in newborns in rural Gambia: a randomised controlled trial. <i>PLOS ONE</i> 7                                                                                                                                               | 2006 | Gambia         | 270 | Africa   | Long. | Rand. | No  | <5y     | 0–1   | Unknown | 572 | 963  | 59% |
| El-Nawawy (2015)                | Nasopharyngeal Carriage, Capsular and Molecular Serotyping and Antimicrobial Susceptibility of <i>Streptococcus pneumoniae</i> among Asymptomatic Healthy Children in Egypt. <i>Journal of Tropical Pediatrics</i> 61 (1)                                                                                       | 2013 | Egypt          | 818 | Africa   | CS    | Outp. | No  | <5y     | 0–5   | 1       | 175 | 600  | 29% |
| Espinosa-de los Monteros (2007) | <i>Streptococcus pneumoniae</i> isolates in healthy children attending day-care centers in 12 state in Mexico. <i>Salud Publica de Mexico</i> 49                                                                                                                                                                | 2002 | Mexico         | 484 | Americas | CS    | Unkn. | No  | <5y     | 1–6   | Unknown | 829 | 2777 | 30% |
| Espinosa-de los Monteros (2010) | Serotype replacement of <i>Streptococcus pneumoniae</i> in children with pneumococcal conjugate vaccine 7V in Mexico. (Spanish). <i>Salud Publica de Mexico</i> 52 (1)                                                                                                                                          | 2004 | Mexico         | 484 | Americas | CS    | Outp. | No  | <5y     | <1    | Unknown | 58  | 183  | 32% |
| Factor (2005)                   | <i>Streptococcus pneumoniae</i> and Haemophilus influenzae type B Carriage, Central Asia. <i>Emerging Infectious Diseases</i> 11                                                                                                                                                                                | 1997 | Kazakhstan     | 398 | Asia     | CS    | Outp. | No  | <5y     | 0–4   | Unknown | 375 | 630  | 60% |
| Farida (2014)                   | Nasopharyngeal carriage of <i>Streptococcus pneumoniae</i> in pneumonia-prone age groups in Semarang, Java Island, Indonesia. <i>PLOS ONE</i> 9                                                                                                                                                                 | 2010 | Indonesia      | 360 | Asia     | CS    | Rand. | No  | <5y     | <1    | 0       | 21  | 45   | 47% |
|                                 |                                                                                                                                                                                                                                                                                                                 | 2010 | Indonesia      | 360 | Asia     | CS    | Rand. | No  | <5y     | 1–1   | Unknown | 24  | 57   | 42% |
|                                 |                                                                                                                                                                                                                                                                                                                 | 2010 | Indonesia      | 360 | Asia     | CS    | Rand. | No  | <5y     | 2–4   | Unknown | 60  | 141  | 43% |
|                                 |                                                                                                                                                                                                                                                                                                                 | 2010 | Indonesia      | 360 | Asia     | CS    | Rand. | No  | 18+y    | 45–70 | Unknown | 28  | 253  | 11% |
| Feikin (2003)                   | Antibiotic resistance and serotype distribution of <i>Streptococcus pneumoniae</i> colonizing rural Malawian children. <i>Pediatric Infectious Disease Journal</i> 22                                                                                                                                           | 1997 | Malawi         | 454 | Africa   | CS    | Outp. | No  | <5y     | 0–4   | Unknown | 761 | 906  | 84% |
|                                 |                                                                                                                                                                                                                                                                                                                 | 2000 | United Kingdom | 826 | Europe   | Long. | Rand. | No  | <5y     | 2–5   | Unknown | 34  | 126  | 27% |
|                                 |                                                                                                                                                                                                                                                                                                                 | 2000 | United Kingdom | 826 | Europe   | Long. | Rand. | No  | 18+y    | 18–59 | Unknown | 6   | 138  | 4%  |
|                                 |                                                                                                                                                                                                                                                                                                                 | 2001 | United Kingdom | 826 | Europe   | Long. | Rand. | No  | <5y     | 2–5   | Unknown | 5   | 203  | 2%  |

|                      |                                                                                                                                                                                                                                                                                                   |      |                |     |          |       |       |    |       |        |         |      |      |       |
|----------------------|---------------------------------------------------------------------------------------------------------------------------------------------------------------------------------------------------------------------------------------------------------------------------------------------------|------|----------------|-----|----------|-------|-------|----|-------|--------|---------|------|------|-------|
| Finn (2003)          | Pneumococcal nasopharyngeal carriage in children following heptavalent pneumococcal conjugate vaccination in infancy. Archives of Disease in Childhood 88                                                                                                                                         | 2001 | United Kingdom | 826 | Europe   | Long. | Rand. | No | <5y   | 2–5    | Unknown | 78   | 188  | 41%   |
| Frazaó (2010)        | Impact of a single dose of the 7-valent pneumococcal conjugate vaccine on colonization. Vaccine 28 (19)                                                                                                                                                                                           | 2001 | Portugal       | 620 | Europe   | Long. | Trial | No | <5y   | 0–2    | Unknown | 68   | 85   | 80%   |
| Galanis (2016)       | Effects of PCV7 and PCV13 on invasive pneumococcal disease and carriage in Stockholm, Sweden. European Respiratory Journal 47 (4)                                                                                                                                                                 | 2004 | Sweden         | 752 | Europe   | CS    | Unkn. | No | <5y   | 1–5    | Unknown | 260  | 719  | 36%   |
| Ganaie (2018)        | Impact of Hajj on the S. pneumoniae carriage among Indian pilgrims during 2016- a longitudinal molecular surveillance study. Travel Medicine and Infectious Disease 23                                                                                                                            | 2016 | India          | 356 | Asia     | CS    | Unkn. | No | 18+y  | 18–100 | 56      | 145  | 807  | 18%   |
| Gentile (2009)       | First National Study of Prevalence for Nasopharyngeal Carriage (NPC) of Streptococcus pneumoniae (Spn) among Non-Vaccinated Children Attending Daycare Centers in Argentina. Abstracts of the Interscience Conference on Antimicrobial Agents and Chemotherapy 49 (C2-1397)                       | 2007 | Argentina      | 32  | Americas | CS    | Unkn. | No | <5y   | 0–2    | Unknown | 211  | 381  | 55%   |
| Gessner (2001)       | Streptococcus pneumoniae nasopharyngeal carriage prevalence, serotype distribution, and resistance patterns among children on Lombok Island, Indonesia. Clinical Infectious Diseases 32                                                                                                           | 1997 | Indonesia      | 360 | Asia     | CS    | Rand. | No | <5y   | 0–1    | 1       | 221  | 484  | 46%   |
| Gessner (2012)       | Pneumococci in the African meningitis belt: meningitis incidence and carriage prevalence in children and adults. PLOS ONE 7                                                                                                                                                                       | 2008 | Burkina Faso   | 854 | Africa   | Long. | Rand. | No | <5y   | <1     | Unknown | 43   | 62   | 69%   |
|                      |                                                                                                                                                                                                                                                                                                   | 2008 | Burkina Faso   | 854 | Africa   | Long. | Rand. | No | <5y   | 1–4    | Unknown | 38   | 88   | 43%   |
|                      |                                                                                                                                                                                                                                                                                                   | 2008 | Burkina Faso   | 854 | Africa   | Long. | Rand. | No | 18+y  | 5–39   | Unknown | 85   | 514  | 17%   |
| Ghaffar (2002)       | Effects of large dosages of amoxicillin/clavulanate or azithromycin on nasopharyngeal carriage of Streptococcus pneumoniae, Haemophilus influenzae, nonpneumococcal alpha -hemolytic streptococci, and Staphylococcus aureus in children with acute otitis media. Clinical Infectious Diseases 34 | 1997 | United States  | 840 | Americas | CS    | Rand. | No | <5y   | 0–5    | Unknown | 5    | 45   | 11%   |
| Giamarellou (2007)   | Characterisation of macrolide-non-susceptible Streptococcus pneumoniae colonising children attending day-care centres in Athens, Greece during 2000 and 2003. Clinical Microbiology and Infection 13                                                                                              | 2000 | Greece         | 300 | Europe   | CS    | Unkn. | No | <5y   | 1–6    | Unknown | 461  | 1451 | 32%   |
|                      |                                                                                                                                                                                                                                                                                                   | 2003 | Greece         | 300 | Europe   | CS    | Unkn. | No | <5y   | 1–6    | Unknown | 485  | 1396 | 35%   |
| Giamarellou (2007)   | Nationwide surveillance of Streptococcus pneumoniae in Greece: patterns of resistance and serotype epidemiology. International Journal of Antimicrobial Agents 30                                                                                                                                 | 2004 | Greece         | 300 | Europe   | CS    | Unkn. | No | 5–17y | 0–6    | 5       | 793  | 2595 | 31%   |
| Glennie (2013)       | Defective pneumococcal-specific Th1 responses in HIV-infected adults precedes a loss of control of pneumococcal colonization. Clinical Infectious Diseases 56                                                                                                                                     | 2010 | Malawi         | 454 | Africa   | CS    | Outp. | No | 18+y  | 21–51  | 30      | 15   | 32   | 47%   |
| Gómez-Barreto (2002) | Carriage of antibiotic-resistant pneumococci in a cohort of a daycare center. Salud Publica de Mexico 44 (1)                                                                                                                                                                                      | 1997 | Mexico         | 484 | Americas | Long. | Unkn. | No | <5y   | 1–5    | Unknown | 178  | 408  | 44%   |
| Gordon (2003)        | Poor potential coverage for 7-valent pneumococcal conjugate vaccine, Malawi. Emerging Infectious Diseases 9 (6)                                                                                                                                                                                   | 1998 | Malawi         | 454 | Africa   | CS    | Rand. | No | 18+y  | ≥18    | Unknown | 54   | 500  | 11%   |
| Granat (2007)        | Longitudinal study on pneumococcal carriage during the first year of life in Bangladesh. Pediatric Infectious Disease Journal 26                                                                                                                                                                  | 2000 | Bangladesh     | 50  | Asia     | Long. | Rand. | No | <5y   | 0–1    | Unknown | 626  | 1459 | 43%   |
| Greenberg (2011)     | Nasopharyngeal carriage of individual Streptococcus pneumoniae serotypes during pediatric pneumonia as a means to estimate serotype disease potential. Pediatric Infectious Disease Journal 30                                                                                                    | 2001 | Israel         | 376 | Asia     | CS    | Outp. | No | <5y   | 0–4    | Unknown | 1504 | 2055 | 73%   |
| Guillemot (1998)     | Low dosage and long treatment duration of beta-lactam: Risk factors for carriage of penicillin-resistant Streptococcus pneumoniae. Journal of the American Medical Association 279 (5)                                                                                                            | 1995 | France         | 250 | Europe   | CS    | Unkn. | No | <5y   | 3–6    | Unknown |      |      | Unkn. |
|                      |                                                                                                                                                                                                                                                                                                   | 2000 | France         | 250 | Europe   | Long. | Unkn. | No | <5y   | 2–4    | Unknown | 47   | 212  | 22%   |
|                      |                                                                                                                                                                                                                                                                                                   | 2000 | France         | 250 | Europe   | Long. | Unkn. | No | <5y   | 2–4    | Unknown | 53   | 377  | 14%   |
|                      |                                                                                                                                                                                                                                                                                                   | 2000 | France         | 250 | Europe   | Long. | Unkn. | No | <5y   | 2–4    | Unknown | 100  | 257  | 39%   |
|                      |                                                                                                                                                                                                                                                                                                   | 2000 | France         | 250 | Europe   | Long. | Unkn. | No | <5y   | 2–4    | Unknown | 90   | 310  | 29%   |
|                      |                                                                                                                                                                                                                                                                                                   | 2000 | France         | 250 | Europe   | Long. | Unkn. | No | <5y   | 2–4    | Unknown | 50   | 183  | 27%   |
|                      |                                                                                                                                                                                                                                                                                                   | 2000 | France         | 250 | Europe   | Long. | Unkn. | No | <5y   | 2–4    | Unknown | 135  | 321  | 42%   |
|                      |                                                                                                                                                                                                                                                                                                   | 2000 | France         | 250 | Europe   | Long. | Unkn. | No | 5–17y | 5–6    | Unknown | 27   | 222  | 12%   |
|                      |                                                                                                                                                                                                                                                                                                   | 2000 | France         | 250 | Europe   | Long. | Unkn. | No | 5–17y | 5–6    | Unknown | 41   | 192  | 21%   |
|                      |                                                                                                                                                                                                                                                                                                   | 2000 | France         | 250 | Europe   | Long. | Unkn. | No | 5–17y | 5–6    | Unknown | 41   | 220  | 19%   |
|                      |                                                                                                                                                                                                                                                                                                   | 2000 | France         | 250 | Europe   | Long. | Unkn. | No | 5–17y | 5–6    | Unknown | 74   | 224  | 33%   |

|                   |                                                                                                                                                                                                                                                       |      |               |     |          |       |       |       |         |       |         |     |      |       |
|-------------------|-------------------------------------------------------------------------------------------------------------------------------------------------------------------------------------------------------------------------------------------------------|------|---------------|-----|----------|-------|-------|-------|---------|-------|---------|-----|------|-------|
|                   |                                                                                                                                                                                                                                                       | 2000 | France        | 250 | Europe   | Long. | Unkn. | No    | 5–17y   | 5–6   | Unknown | 46  | 172  | 27%   |
|                   |                                                                                                                                                                                                                                                       | 2000 | France        | 250 | Europe   | Long. | Unkn. | No    | 5–17y   | 5–6   | Unknown | 114 | 278  | 41%   |
| Hadinegoro (2016) | Nasopharyngeal Carriage of Streptococcus Pneumoniae in Healthy Children under Five Years Old in Central Lombok Regency, Indonesia. Southeast Asian Journal of Tropical Medicine and Public Health 47 (3)                                              | 2012 | Indonesia     | 360 | Asia     | CS    | Rand. | No    | <5y     | 0–5   | Unknown | 554 | 1200 | 46%   |
| Hammit (2014)     | Population effect of 10-valent pneumococcal conjugate vaccine on nasopharyngeal carriage of Streptococcus pneumoniae and non-typeable Haemophilus influenzae in Kilifi, Kenya: findings from cross-sectional carriage studies. Lancet Global Health 2 | 2009 | Kenya         | 404 | Africa   | CS    | Rand. | No    | <5y     | 0–4   | Unknown | 229 | 308  | 74%   |
| Hanieh (2014)     | Streptococcus pneumoniae carriage prevalence in Nepal: Evaluation of a method for delayed transport of samples from remote regions and implications for vaccine implementation. PLOS ONE 9                                                            | 2009 | Nepal         | 524 | Asia     | CS    | Outp. | No    | <5y     | 0–2   | Unknown | 337 | 574  | 57%   |
|                   |                                                                                                                                                                                                                                                       | 2009 | Nepal         | 524 | Asia     | CS    | Outp. | No    | <5y     | 0–2   | Unknown | 364 | 526  | 69%   |
| Hanke (2016)      | Bacterial density, serotype distribution and antibiotic resistance of pneumococcal strains from the nasopharynx of peruvian children before and after pneumococcal conjugate vaccine 7. Pediatric Infectious Disease Journal 35 (4)                   | 2009 | Peru          | 604 | Americas | CS    | Rand. | No    | <5y     | 0–3   | Unknown | 125 |      | Unkn. |
| Harboe (2012)     | A Pneumococcal carriage study in danish pre-school children before the introduction of pneumococcal conjugate vaccination. Open Microbiology Journal 6                                                                                                | 1999 | Denmark       | 208 | Europe   | CS    | Unkn. | No    | <5y     | 1–1   | Unknown | 247 | 437  | 57%   |
|                   |                                                                                                                                                                                                                                                       | 1999 | Denmark       | 208 | Europe   | CS    | Unkn. | No    | <5y     | 2–2   | Unknown | 247 | 437  | 57%   |
|                   |                                                                                                                                                                                                                                                       | 1999 | Denmark       | 208 | Europe   | CS    | Unkn. | No    | <5y     | 3–3   | Unknown | 247 | 437  | 57%   |
|                   |                                                                                                                                                                                                                                                       | 1999 | Denmark       | 208 | Europe   | CS    | Unkn. | No    | <5y     | 4–4   | Unknown | 247 | 437  | 57%   |
|                   |                                                                                                                                                                                                                                                       | 1999 | Denmark       | 208 | Europe   | CS    | Unkn. | No    | <5y     | 5–5   | Unknown | 247 | 437  | 57%   |
| Heath (2018)      | Nasopharyngeal carriage of streptococcus pneumoniae in children in Coastal Kenya. American Journal of Tropical Medicine and Hygiene 98 (4)                                                                                                            | 2006 | Kenya         | 404 | Africa   | CS    | Rand. | No    | <5y     | 0–1   | 0       | 65  | 323  | 20%   |
|                   |                                                                                                                                                                                                                                                       | 2014 | Kenya         | 404 | Africa   | CS    | Rand. | No    | 5–17y   | 4–7   | 6.1     | 65  | 323  | 20%   |
| Hennessy (2002)   | Changes in antibiotic-prescribing practices and carriage of penicillin-resistant Streptococcus pneumoniae: A controlled intervention trial in rural Alaska. Clinical Infectious Diseases 34                                                           | 1998 | United States | 840 | Americas | CS    | Rand. | Yes   | <5y     | <1    | 0       | 14  | 29   | 48%   |
|                   |                                                                                                                                                                                                                                                       | 1998 | United States | 840 | Americas | CS    | Rand. | Yes   | <5y     | 1–1   | Unknown | 19  | 34   | 56%   |
|                   |                                                                                                                                                                                                                                                       | 1998 | United States | 840 | Americas | CS    | Rand. | Yes   | <5y     | 2–4   | Unknown | 64  | 102  | 63%   |
|                   |                                                                                                                                                                                                                                                       | 1998 | United States | 840 | Americas | CS    | Rand. | Yes   | 5–17y   | 5–17  | Unknown | 201 | 428  | 47%   |
|                   |                                                                                                                                                                                                                                                       | 1998 | United States | 840 | Americas | CS    | Rand. | Yes   | 18+y    | ≥60   | Unknown | 6   | 62   | 10%   |
|                   |                                                                                                                                                                                                                                                       | 1998 | United States | 840 | Americas | CS    | Rand. | Yes   | 18+y    | 18–59 | Unknown | 61  | 448  | 14%   |
|                   |                                                                                                                                                                                                                                                       | 1999 | United States | 840 | Americas | CS    | Rand. | Yes   | <5y     | <1    | 0       | 13  | 25   | 52%   |
|                   |                                                                                                                                                                                                                                                       | 1999 | United States | 840 | Americas | CS    | Rand. | Yes   | <5y     | 1–1   | 1       | 13  | 25   | 52%   |
|                   |                                                                                                                                                                                                                                                       | 1999 | United States | 840 | Americas | CS    | Rand. | Yes   | <5y     | 2–4   | Unknown | 46  | 87   | 53%   |
|                   |                                                                                                                                                                                                                                                       | 1999 | United States | 840 | Americas | CS    | Rand. | Yes   | 5–17y   | 5–18  | Unknown | 170 | 425  | 40%   |
|                   |                                                                                                                                                                                                                                                       | 1999 | United States | 840 | Americas | CS    | Rand. | Yes   | 18+y    | ≥60   | Unknown | 5   | 50   | 10%   |
|                   |                                                                                                                                                                                                                                                       | 1999 | United States | 840 | Americas | CS    | Rand. | Yes   | 18+y    | 18–59 | Unknown | 48  | 400  | 12%   |
|                   |                                                                                                                                                                                                                                                       | 2000 | United States | 840 | Americas | CS    | Rand. | Yes   | <5y     | <1    | 0       | 13  | 19   | 68%   |
|                   |                                                                                                                                                                                                                                                       | 2000 | United States | 840 | Americas | CS    | Rand. | Yes   | <5y     | 1–1   | Unknown | 11  | 19   | 58%   |
|                   |                                                                                                                                                                                                                                                       | 2000 | United States | 840 | Americas | CS    | Rand. | Yes   | <5y     | 2–4   | Unknown | 34  | 81   | 42%   |
|                   |                                                                                                                                                                                                                                                       | 2000 | United States | 840 | Americas | CS    | Rand. | Yes   | 5–17y   | 5–17  | Unknown | 193 | 435  | 44%   |
|                   |                                                                                                                                                                                                                                                       | 2000 | United States | 840 | Americas | CS    | Rand. | Yes   | 18+y    | ≥60   | Unknown | 4   | 61   | 7%    |
| 2000              | United States                                                                                                                                                                                                                                         | 840  | Americas      | CS  | Rand.    | Yes   | 18+y  | 18–59 | Unknown | 58    | 411     | 14% |      |       |
| 1998              | United States                                                                                                                                                                                                                                         | 840  | Americas      | CS  | Rand.    | Yes   | <5y   | <1    | 0       | 14    | 28      | 50% |      |       |
| 1998              | United States                                                                                                                                                                                                                                         | 840  | Americas      | CS  | Rand.    | Yes   | <5y   | 2–4   | Unknown | 40    | 86      | 47% |      |       |
| 1998              | United States                                                                                                                                                                                                                                         | 840  | Americas      | CS  | Rand.    | Yes   | 5–17y | 5–17  | Unknown | 152   | 340     | 45% |      |       |

|                          |                                                                                                                                                                                                                                                      |      |                     |     |          |       |       |     |       |         |         |      |      |       |
|--------------------------|------------------------------------------------------------------------------------------------------------------------------------------------------------------------------------------------------------------------------------------------------|------|---------------------|-----|----------|-------|-------|-----|-------|---------|---------|------|------|-------|
| Hennessy (2002)          | Effect of high-dose amoxicillin on the prevalence of penicillin-resistant Streptococcus pneumoniae in rural Alaska. Journal of the American Medical Association 287                                                                                  | 1998 | United States       | 840 | Americas | CS    | Rand. | Yes | 18+y  | ≥60     | Unknown | 9    | 53   | 17%   |
|                          |                                                                                                                                                                                                                                                      | 1998 | United States       | 840 | Americas | CS    | Rand. | Yes | 18+y  | 18–59   | Unknown | 49   | 357  | 14%   |
| Henriques Normark (2003) | Clonal analysis of Streptococcus pneumoniae nonsusceptible to penicillin at day-care centers with index cases, in a region with low incidence of resistance: emergence of an invasive type 35B clone among carriers. Microbial Drug Resistance 9 (4) | 1997 | Sweden              | 752 | Europe   | CS    | Unkn. | No  | <5y   | 1–6     | 3       | 246  | 611  | 40%   |
| Hermans (2011)           | Epidemiology of Streptococcus pneumoniae and Staphylococcus aureus colonization in healthy Venezuelan children. European Journal of Clinical Microbiology and Infectious Diseases 30                                                                 | 2007 | Venezuela           | 862 | Americas | CS    | Unkn. | No  | <5y   | 2–5     | 5       | 71   | 250  | 28%   |
| Hill (2008)              | Nasopharyngeal carriage of Streptococcus pneumoniae in Gambian infants: A longitudinal study. Clinical Infectious Diseases 46                                                                                                                        | 2005 | Gambia              | 270 | Africa   | Long. | Trial | No  | <5y   | 0–1     | 0       | 2710 | 3145 | 86%   |
| Hjalmarsdottir (2015)    | Prevalence of pilus genes in pneumococci isolated from healthy preschool children in Iceland: association with vaccine serotypes and antibiotic resistance. Journal of Antimicrobial Chemotherapy 70 (8)                                             | 2009 | Iceland             | 352 | Europe   | CS    | Unkn. | No  | <5y   | 1.2–6.3 | Unknown | 372  | 516  | 72%   |
| Hjalmarsdottir (2016)    | Cocolonization of Pneumococcal Serotypes in Healthy Children Attending Day Care Centers: Molecular Versus Conventional Methods. Pediatric Infectious Disease Journal 35 (5)                                                                          | 2009 | Iceland             | 352 | Europe   | CS    | Unkn. | No  | <5y   | 1.2–6.3 | 4.2     | 371  | 514  | 72%   |
|                          |                                                                                                                                                                                                                                                      | 1999 | Hong Kong SAR China | 344 | Asia     | CS    | Unkn. | No  | <5y   | 2–4     | 3       | 209  | 1079 | 19%   |
| Ho (2004)                | Serotype distribution and antimicrobial resistance patterns of nasopharyngeal and invasive Streptococcus pneumoniae isolates in Hong Kong children. Vaccine 22                                                                                       | 1999 | Hong Kong SAR China | 344 | Asia     | CS    | Unkn. | No  | 5–17y | 5–6     | Unknown | 174  | 898  | 19%   |
|                          |                                                                                                                                                                                                                                                      | 1995 | Sweden              | 752 | Europe   | CS    | Unkn. | No  | <5y   | 1–1     | 1       |      |      | Unkn. |
| Hogberg (2007)           | Age- and serogroup-related differences in observed durations of nasopharyngeal carriage of penicillin-resistant pneumococci. Journal of Clinical Microbiology 45                                                                                     | 1995 | Sweden              | 752 | Europe   | CS    | Unkn. | No  | 5–17y | 5–6     | Unknown | 339  |      | Unkn. |
|                          |                                                                                                                                                                                                                                                      | 1995 | Sweden              | 752 | Europe   | CS    | Unkn. | No  | 5–17y | 7–18    | Unknown |      |      | Unkn. |
|                          |                                                                                                                                                                                                                                                      | 1995 | Sweden              | 752 | Europe   | CS    | Unkn. | No  | 18+y  | ≥18     | Unknown | 256  |      | Unkn. |
|                          |                                                                                                                                                                                                                                                      | 1998 | Sweden              | 752 | Europe   | CS    | Unkn. | No  | <5y   | 3–4     | Unknown | 632  |      | Unkn. |
| Hu (2016)                | Streptococcus pneumoniae and Haemophilus influenzae type b carriage in Chinese children aged 12–18 months in Shanghai, China: a cross-sectional study. BMC Infectious Diseases 16                                                                    | 2009 | China               | 156 | Asia     | CS    | Outp. | No  | <5y   | 1–1.5   | Unknown | 102  | 614  | 17%   |
| Huebner (1997)           | Nasopharyngeal carriage of community-acquired, antibiotic-resistant Streptococcus pneumoniae in a Zambian paediatric population. Bulletin of the World Health Organization 75                                                                        | 1994 | Zambia              | 894 | Africa   | CS    | Outp. | No  | <5y   | 0–5     | Unknown | 187  | 260  | 72%   |
| Huebner (2000)           | Prevalence of nasopharyngeal antibiotic-resistant pneumococcal carriage in children attending private paediatric practices in Johannesburg. South African Medical Journal 90                                                                         | 1999 | South Africa        | 710 | Africa   | CS    | Outp. | No  | <5y   | 1–5     | Unknown | 121  | 303  | 40%   |
| Hussain (2005)           | A longitudinal household study of Streptococcus pneumoniae nasopharyngeal carriage in a UK setting. Epidemiology and Infection 133 (5)                                                                                                               | 2001 | United Kingdom      | 826 | Europe   | CS    | Unkn. | No  | <5y   | 0–4     | Unknown |      |      | Unkn. |
|                          |                                                                                                                                                                                                                                                      | 2001 | United Kingdom      | 826 | Europe   | CS    | Unkn. | No  | 5–17y | 5–19    | Unknown |      |      | Unkn. |
|                          |                                                                                                                                                                                                                                                      | 2001 | United Kingdom      | 826 | Europe   | CS    | Unkn. | No  | 18+y  | ≥20     | Unknown |      |      | Unkn. |
| Ishihara (2015)          | Detection and Serotyping of Streptococcus pneumoniae Carried in Healthy Adults with a Modified PCR Method. (Japanese). Kansenshogaku zasshi. The Journal of the Japanese Association for Infectious Diseases 89 (3)                                  | 2011 | Japan               | 392 | Asia     | Unkn. | Unkn. | No  | 18+y  | ≥40     | Unknown | 36   | 110  | 33%   |
| Joloba (2001)            | High prevalence of carriage of antibiotic-resistant Streptococcus pneumoniae in children in Kampala Uganda. International Journal of Antimicrobial Agents 17                                                                                         | 1995 | Uganda              | 800 | Africa   | CS    | Outp. | No  | <5y   | 0–3     | Unknown | 118  | 191  | 62%   |
| Jourdain (2011)          | Differences in nasopharyngeal bacterial carriage in preschool children from different socio-economic origins. Clinical Microbiology and Infection 17                                                                                                 | 2006 | Belgium             | 56  | Europe   | CS    | Unkn. | No  | <5y   | 3–6     | Unknown | 346  | 1347 | 26%   |
| Kamng'ona (2015)         | High multiple carriage and emergence of Streptococcus pneumoniae vaccine serotype variants in Malawian children. BMC Infectious Diseases 15                                                                                                          | 2008 | Malawi              | 454 | Africa   | CS    | Rand. | No  | <5y   | 0–13    | 4.9     | 72   |      | Unkn. |
| Kandasamy (2015)         | Multi-serotype pneumococcal nasopharyngeal carriage prevalence in vaccine naive Nepalese children, assessed using molecular serotyping. PLOS ONE 10 (2)                                                                                              | 2012 | Nepal               | 524 | Asia     | CS    | Unkn. | No  | <5y   | 0–2     | Unknown | 309  | 600  | 52%   |
| Katsarolis (2009)        | Risk factors for nasopharyngeal carriage of drug-resistant Streptococcus pneumoniae: data from a nation-wide surveillance study in Greece. BMC Infectious Diseases 9                                                                                 | 2004 | Greece              | 300 | Europe   | CS    | Unkn. | No  | <5y   | 0–6     | 4       | 317  |      | Unkn. |
|                          |                                                                                                                                                                                                                                                      | 2006 | Ethiopia            | 231 | Africa   | CS    | Trial | No  | <5y   | 0–9     | Unknown | 76   | 110  | 69%   |



|                   |                                                                                                                                                                                                                                                                     |      |             |     |          |       |       |     |       |      |         |      |      |       |
|-------------------|---------------------------------------------------------------------------------------------------------------------------------------------------------------------------------------------------------------------------------------------------------------------|------|-------------|-----|----------|-------|-------|-----|-------|------|---------|------|------|-------|
| Keenan (2016)     | Nasopharyngeal Pneumococcal Serotypes Before and After Mass Azithromycin Distributions for Trachoma. <i>Journal of the Pediatric Infectious Diseases Society</i> 5 (2)                                                                                              | 2006 | Ethiopia    | 231 | Africa   | CS    | Trial | No  | <5y   | 0–9  | Unknown | 98   | 120  | 82%   |
| Kellner (1999)    | Streptococcus pneumoniae carriage in children attending 59 Canadian child care centers. <i>Archives of Pediatrics and Adolescent Medicine</i> 153                                                                                                                   | 1995 | Canada      | 124 | Americas | CS    | Outp. | No  | <5y   | 1–2  | Unknown | 568  | 1322 | 43%   |
| Kim (2011)        | Nasopharyngeal Pneumococcal Carriage of Children Attending Day Care Centers in Korea: Comparison between Children Immunized with 7-valent Pneumococcal Conjugate Vaccine and Non-immunized. <i>Journal of Korean Medical Science</i> 26 (2)                         | 2008 | South Korea | 410 | Asia     | CS    | Unkn. | No  | <5y   | 1–4  | Unknown | 63   | 200  | 32%   |
| Klugman (1998)    | Antibiotic resistance of nasopharyngeal isolates of Streptococcus pneumoniae from children in Lesotho. <i>Bulletin of the World Health Organization</i> 76                                                                                                          | 1995 | Lesotho     | 426 | Africa   | CS    | Rand. | No  | <5y   | 0–4  | Unknown | 310  |      | Unkn. |
| Kobayashi (2017)  | Pneumococcal carriage and antibiotic susceptibility patterns from two cross-sectional colonization surveys among children aged <5 years prior to the introduction of 10-valent pneumococcal conjugate vaccine - Kenya, 2009-2010. <i>BMC Infectious Diseases</i> 17 | 2009 | Kenya       | 404 | Africa   | CS    | Rand. | No  | <5y   | 0–4  | Unknown | 983  | 1087 | 90%   |
| Kozlov (2006)     | Antimicrobial resistance of nasopharyngeal pneumococci from children from day-care centres and orphanages in Russia: results of a unique prospective multicentre study. <i>Clinical Microbiology and Infection</i> 12                                               | 2001 | Russia      | 643 | Europe   | CS    | Unkn. | No  | <5y   | 0–4  | Unknown | 2056 | 4153 | 50%   |
| Kumar (2014)      | Nasopharyngeal carriage, antibiogram and serotype distribution of Streptococcus pneumoniae among healthy under five children. <i>Indian Journal of Medical Research</i> 140 (2)                                                                                     | 2010 | India       | 356 | Asia     | CS    | Outp. | No  | <5y   | ≤5   | Unknown | 53   | 190  | 28%   |
| Lagos (2008)      | Age- and serotype-specific pediatric invasive pneumococcal disease: insights from systematic surveillance in Santiago, Chile, 1994–2007. <i>Journal of Infectious Diseases</i> 198                                                                                  | 2000 | Chile       | 152 | Americas | Long. | Rand. | No  | <5y   | 1–1  | 1       | 184  | 457  | 40%   |
|                   |                                                                                                                                                                                                                                                                     | 2001 | Chile       | 152 | Americas | Long. | Rand. | No  | <5y   | <1   | 0       | 177  | 464  | 38%   |
|                   |                                                                                                                                                                                                                                                                     | 2001 | Chile       | 152 | Americas | Long. | Rand. | No  | <5y   | <1   | 0       | 127  | 420  | 30%   |
|                   |                                                                                                                                                                                                                                                                     | 2001 | Chile       | 152 | Americas | Long. | Rand. | No  | <5y   | 1–1  | 1       | 167  | 440  | 38%   |
|                   |                                                                                                                                                                                                                                                                     | 2001 | Chile       | 152 | Americas | Long. | Rand. | No  | <5y   | 2–2  | 2       | 161  | 434  | 37%   |
| Lauderdale (2005) | High carriage rate of high-level penicillin-resistant Streptococcus pneumoniae in a Taiwan kindergarten associated with a case of pneumococcal meningitis. <i>BMC Infectious Diseases</i> 5 (1)                                                                     | 2002 | Taiwan      | 158 | Asia     | CS    | Unkn. | No  | 5–17y | 4–6  | Unknown | 31   | 77   | 40%   |
| Laval (2006)      | Serotypes of carriage and invasive isolates of Streptococcus pneumoniae in Brazilian children in the era of pneumococcal vaccines. <i>Clinical Microbiology and Infection</i> 12 (1)                                                                                | 2000 | Brazil      | 76  | Americas | CS    | Outp. | No  | <5y   | <1   | 0       | 50   | 120  | 42%   |
|                   |                                                                                                                                                                                                                                                                     | 2000 | Brazil      | 76  | Americas | CS    | Outp. | No  | <5y   | 1–1  | Unknown | 75   | 182  | 41%   |
| Leach (1997)      | A prospective study of the impact of community-based azithromycin treatment of trachoma on carriage and resistance of Streptococcus pneumoniae. <i>Clinical Infectious Diseases</i> 24                                                                              | 1995 | Australia   | 36  | Oceania  | CS    | Unkn. | Yes | 5–17y | 5–14 | Unknown | 54   | 79   | 68%   |
|                   |                                                                                                                                                                                                                                                                     | 1995 | Australia   | 36  | Oceania  | CS    | Unkn. | Yes | 5–17y | 6–14 | Unknown | 34   | 39   | 87%   |
| Leibovitz (1999)  | Nasopharyngeal carriage of multidrug-resistant Streptococcus pneumoniae in institutionalized HIV-infected and HIV-negative children in northeastern Romania. <i>International Journal of Infectious Diseases</i> 3 (4)                                              | 1996 | Romania     | 642 | Europe   | CS    | Unkn. | No  | <5y   | 0–5  | 1       | 93   | 202  | 46%   |
| Leibovitz (2007)  | Antibiotic susceptibility, serotype distribution and vaccine coverage of nasopharyngeal and oropharyngeal streptococcus pneumoniae in a day-care in St. Petersburg, Russia. <i>Scandinavian Journal of Infectious Diseases</i> 39                                   | 2003 | Russia      | 643 | Europe   | CS    | Unkn. | No  | <5y   | 1–5  | Unknown | 75   | 125  | 60%   |
| Leino (2001)      | Pneumococcal carriage in children during their first two years: important role of family exposure. <i>Pediatric Infectious Disease Journal</i> 20                                                                                                                   | 1994 | Finland     | 246 | Europe   | Long. | Unkn. | No  | <5y   | 0–4  | Unknown | 189  | 676  | 28%   |
| Leino (2008)      | Clustering of serotypes in a longitudinal study of Streptococcus pneumoniae carriage in three day care centres. <i>BMC Infectious Diseases</i> 8                                                                                                                    | 2001 | Finland     | 246 | Europe   | Long. | Unkn. | No  | <5y   | 1–6  | Unknown | 132  | 521  | 25%   |
|                   |                                                                                                                                                                                                                                                                     | 2001 | Finland     | 246 | Europe   | Long. | Unkn. | No  | 5–17y | 5–10 | Unknown | 36   | 287  | 13%   |
|                   |                                                                                                                                                                                                                                                                     | 2001 | Finland     | 246 | Europe   | Long. | Unkn. | No  | 18+y  | ≥18  | Unknown | 35   | 1133 | 3%    |
| Levidiotou (2006) | Serotype distribution of Streptococcus pneumoniae in north-western Greece and implications for a vaccination programme. <i>FEMS Immunology and Medical Microbiology</i> 48 (2)                                                                                      | 2000 | Greece      | 300 | Europe   | CS    | Unkn. | No  | <5y   | 3–4  | Unknown | 172  | 464  | 37%   |
| Levine (2012)     | Dynamics of pneumococcal acquisition and carriage in young adults during training in confined settings in Israel. <i>PLOS ONE</i> 7                                                                                                                                 | 2007 | Israel      | 376 | Asia     | Long. | Unkn. | No  | 18+y  | ≥18  | Unknown | 202  | 1872 | 11%   |
| Li (2001)         | Nasal carriage of Streptococcus pneumoniae among children in Beijing. <i>Chinese Medical Journal</i> 114 (11)                                                                                                                                                       | 1999 | China       | 156 | Asia     | CS    | Outp. | No  | <5y   | 0–5  | Unknown | 100  | 269  | 37%   |
| Lin (2009)        | National survey of invasive pneumococcal diseases in Taiwan under partial PCV7 vaccination in 2007: emergence of serotype 19A with high invasive potential. <i>Vaccine</i> 27                                                                                       | 2007 | Taiwan      | 158 | Asia     | CS    | Outp. | No  | <5y   | 0–5  | Unknown | 165  | 1128 | 15%   |

|                    |                                                                                                                                                                                                                                                                                                                                                                                                                                |      |               |     |          |       |       |     |       |       |         |      |      |       |
|--------------------|--------------------------------------------------------------------------------------------------------------------------------------------------------------------------------------------------------------------------------------------------------------------------------------------------------------------------------------------------------------------------------------------------------------------------------|------|---------------|-----|----------|-------|-------|-----|-------|-------|---------|------|------|-------|
| Lindstrand (2016)  | Pneumococcal Carriage in Children under Five Years in Uganda-Will Present Pneumococcal Conjugate Vaccines Be Appropriate?. PLOS ONE 11 (11)                                                                                                                                                                                                                                                                                    | 2008 | Uganda        | 800 | Africa   | CS    | Rand. | No  | <5y   | 0-5   | Unknown | 957  | 1723 | 101%  |
| Lloyd-Evans (1996) | Nasopharyngeal carriage of pneumococci in Gambian children and in their families. Pediatric Infectious Disease Journal 15 (10)                                                                                                                                                                                                                                                                                                 | 1990 | Gambia        | 270 | Africa   | CS    | Rand. | No  | <5y   | 0-4   | Unknown | 86   | 113  | 76%   |
| Lopez (1999)       | Epidemiological study of Streptococcus pneumoniae carriers in healthy primary-school children. European Journal of Clinical Microbiology and Infectious Diseases 18 (11)                                                                                                                                                                                                                                                       | 1997 | Spain         | 724 | Europe   | Long. | Unkn. | No  | 5-17y | 6-6   | 6       | 120  | 996  | 12%   |
| Lucarevski (2003)  | Oropharyngeal carriage of Streptococcus pneumoniae by children attending day care centers in Taubate, SP: Correlation between serotypes and the conjugated heptavalent pneumococcal vaccine. Portuguese Colonizacao de orofaringe por Streptococcus pneumoniae em crianca de creches municipais de Taubate-SP: Correlacao entre os principais sorotipos e a vacina pneumococica conjugada heptavalente. Jornal de Pediatria 79 | 1998 | Brazil        | 76  | Americas | CS    | Unkn. | No  | <5y   | 1-6   | 5       | 209  | 987  | 21%   |
| Luminos (2014)     | Nasopharyngeal carriage of Streptococcus pneumoniae in Romanian children before the introduction of the pneumococcal conjugated vaccination into the national immunization programme: a national, multi-centre, cross-sectional observational study. International Journal of Infectious Diseases 29                                                                                                                           | 2011 | Romania       | 642 | Europe   | CS    | Outp. | No  | <5y   | 0-1   | Unknown | 31   | 186  | 17%   |
|                    |                                                                                                                                                                                                                                                                                                                                                                                                                                | 2011 | Romania       | 642 | Europe   | CS    | Outp. | No  | <5y   | 1-2   | Unknown | 162  | 751  | 22%   |
|                    |                                                                                                                                                                                                                                                                                                                                                                                                                                | 2011 | Romania       | 642 | Europe   | CS    | Outp. | No  | <5y   | 3-4   | Unknown | 312  | 1063 | 29%   |
| Madhi (2007)       | Long-term effect of pneumococcal conjugate vaccine on nasopharyngeal colonization by Streptococcus pneumoniae and associated interactions with Staphylococcus aureus and Haemophilus influenzae colonization in HIV-Infected and HIV-uninfected children. Journal of Infectious Diseases 196 (11)                                                                                                                              | 2001 | South Africa  | 710 | Africa   | CS    | Trial | No  | 5-17y | 5-6   | 5       | 79   | 150  | 53%   |
| Madhi (2013)       | Acquisition of Streptococcus pneumoniae in pneumococcal conjugate vaccine-naive South African children and their mothers. Pediatric Infectious Disease Journal 32                                                                                                                                                                                                                                                              | 2007 | South Africa  | 710 | Africa   | Long. | Outp. | No  | <5y   | 1-1   | 0       | 1093 | 1851 | 59%   |
|                    |                                                                                                                                                                                                                                                                                                                                                                                                                                | 2007 | South Africa  | 710 | Africa   | Long. | Outp. | No  | 18+y  | ≥18   | 28      | 343  | 1846 | 19%   |
| Mahanta (2012)     | Serotype distribution and sensitivity pattern of nasopharyngeal colonizing streptococcus pneumoniae among rural children of Eastern India. Indian Journal of Medical Research 136                                                                                                                                                                                                                                              | 2009 | India         | 356 | Asia     | CS    | Unkn. | No  | <5y   | 0-4   | Unknown | 104  | 811  | 13%   |
| Malfroot (2004)    | A cross-sectional survey of the prevalence of Streptococcus pneumoniae nasopharyngeal carriage in Belgian infants attending day care centres. Clinical Microbiology and Infection 10                                                                                                                                                                                                                                           | 2000 | Belgium       | 56  | Europe   | CS    | Unkn. | No  | <5y   | 1-3   | Unknown | 98   | 467  | 21%   |
| Masri (2013)       | Determination of phenotypes and pneumococcal surface protein a family types of Streptococcus pneumoniae from Malaysian healthy children. Journal of Microbiology, Immunology and Infection 46                                                                                                                                                                                                                                  | 2010 | Malaysia      | 458 | Asia     | CS    | Unkn. | No  | <5y   | 0-5   | Unknown | 69   | 195  | 35%   |
| Mastro (1993)      | Use of nasopharyngeal isolates of Streptococcus pneumoniae and Haemophilus influenzae from children in Pakistan for surveillance for antimicrobial resistance. Pediatric Infectious Disease Journal 12 (10)                                                                                                                                                                                                                    | 1989 | Pakistan      | 586 | Asia     | CS    | Rand. | No  | <5y   | 0-4   | 1       | 244  | 418  | 58%   |
| Mbelle (1999)      | Immunogenicity and impact on nasopharyngeal carriage of a nonvalent pneumococcal conjugate vaccine. Journal of Infectious Diseases 180 (4)                                                                                                                                                                                                                                                                                     | NA   | South Africa  | 710 | Africa   | CS    | Trial | No  | <5y   | <1    | Unknown |      | 239  | Unkn. |
| Mbelle (1999)      | Streptococcus pneumoniae and haemophilus influenzae type B carriage in infants presenting to Zola Community Health centre for routine immunization. Doctoral dissertation, University of the Witwatersrand                                                                                                                                                                                                                     | 1996 | South Africa  | 710 | Africa   | CS    | Outp. | No  | <5y   | 0-5   | Unknown | 121  | 278  | 44%   |
| McGee (2001)       | Prevalence of serotypes and molecular epidemiology of Streptococcus pneumoniae strains isolated from children in Beijing, China: identification of two novel multiply-resistant clones. Microbial Drug Resistance 7                                                                                                                                                                                                            | 1997 | China         | 156 | Asia     | CS    | Outp. | No  | <5y   | 0-5   | Unknown | 326  |      | Unkn. |
| Menezes (2016)     | Nasopharyngeal carriage of Streptococcus pneumoniae among children in an urban setting in Brazil prior to PCV10 introduction. Vaccine 34 (6)                                                                                                                                                                                                                                                                                   | 2008 | Brazil        | 76  | Americas | Long. | Rand. | No  | <5y   | 0-5   | Unknown | 398  | 721  | 55%   |
| Mercado (2012)     | Pneumococcal serotypes in carrier children prior to the introduction of anti-pneumococcal vaccines in Peru (Spanish). Revista Peruana de Medicina Experimental y Salud Publica 29 (1)                                                                                                                                                                                                                                          | 2003 | Peru          | 604 | Americas | CS    | Outp. | No  | <5y   | 0-1   | 1       | 80   | 270  | 30%   |
|                    |                                                                                                                                                                                                                                                                                                                                                                                                                                | 2007 | Peru          | 604 | Americas | CS    | Outp. | No  | <5y   | <1    | Unknown | 286  | 1145 | 25%   |
| Millar (2008)      | Indirect effect of 7-valent pneumococcal conjugate vaccine on pneumococcal colonization among unvaccinated household members. Clinical Infectious Diseases 47                                                                                                                                                                                                                                                                  | 2001 | United States | 840 | Americas | Long. | Trial | Yes | <5y   | 0-1   | 1       | 19   | 37   | 51%   |
|                    |                                                                                                                                                                                                                                                                                                                                                                                                                                | 2001 | United States | 840 | Americas | Long. | Trial | Yes | <5y   | 2-4   | 3       | 40   | 62   | 65%   |
|                    |                                                                                                                                                                                                                                                                                                                                                                                                                                | 2001 | United States | 840 | Americas | Long. | Trial | Yes | 5-17y | 5-17  | Unknown | 210  | 568  | 37%   |
|                    |                                                                                                                                                                                                                                                                                                                                                                                                                                | 2001 | United States | 840 | Americas | Long. | Trial | Yes | 18+y  | 18-64 | Unknown | 54   | 677  | 8%    |
|                    |                                                                                                                                                                                                                                                                                                                                                                                                                                | 2001 | United States | 840 | Americas | Long. | Trial | Yes | 18+y  | 65-88 | Unknown | 5    | 29   | 17%   |

|                        |                                                                                                                                                                                                                                                                     |      |               |     |          |       |       |     |       |        |         |     |       |       |
|------------------------|---------------------------------------------------------------------------------------------------------------------------------------------------------------------------------------------------------------------------------------------------------------------|------|---------------|-----|----------|-------|-------|-----|-------|--------|---------|-----|-------|-------|
| Mills (2015)           | Epidemiology of pneumococcal carriage in children under five years of age in Accra, Ghana. <i>Infectious Diseases</i> 47 (5)                                                                                                                                        | 2011 | Ghana         | 288 | Africa   | CS    | Rand. | No  | <5y   | 0.25–5 | Unknown | 207 | 423   | 49%   |
| Miranda Novales (1997) | Streptococcus pneumoniae: low frequency of penicillin resistance and high resistance to trimethoprim-sulfamethoxazole in nasopharyngeal isolates from children in a rural area in Mexico. <i>Archives of Medical Research</i> 28 (4)                                | 1994 | Mexico        | 484 | Americas | CS    | Outp. | No  | <5y   | 0–4    | Unknown | 65  | 127   | 51%   |
| Moll (2008)            | Factors associated with pneumococcal carriage in healthy Dutch infants: the generation R study. <i>Journal of Pediatrics</i> 153                                                                                                                                    | 2003 | Netherlands   | 528 | Europe   | Long. | Rand. | No  | <5y   | <1     | 0       | 52  | 627   | 8%    |
|                        |                                                                                                                                                                                                                                                                     | 2003 | Netherlands   | 528 | Europe   | Long. | Rand. | No  | <5y   | <1     | 0       | 260 | 832   | 31%   |
|                        |                                                                                                                                                                                                                                                                     | 2003 | Netherlands   | 528 | Europe   | Long. | Rand. | No  | <5y   | 1–1    | 1       | 337 | 757   | 45%   |
| Moniri (2014)          | Serotyping, Antibiotic Susceptibility and Related Risk Factors Aspects of Nasopharyngeal Carriage of Streptococcus pneumoniae in Healthy School Students. <i>Iranian Journal of Public Health</i> 43                                                                | 2011 | Iran          | 364 | Asia     | CS    | Unkn. | No  | 5–17y | 7–19   | Unknown | 291 | 2100  | 14%   |
| Moreno (2013)          | Changes in Streptococcus pneumoniae serotype distribution in invasive disease and nasopharyngeal carriage after the heptavalent pneumococcal conjugate vaccine introduction in Bogota, Colombia. <i>Vaccine</i> 31                                                  | 2005 | Colombia      | 170 | Americas | CS    | Rand. | No  | <5y   | 1–1    | 1       | 137 | 246   | 56%   |
| Mousavi (2013)         | Serotyping of Streptococcus pneumoniae isolated from Tehran by Multiplex PCR: Are serotypes of clinical and carrier isolates identical?. <i>Iranian Journal of Microbiology</i> 5                                                                                   | 2011 | Iran          | 364 | Asia     | CS    | Outp. | No  | <5y   | 0–4    | Unknown | 40  | 150   | 27%   |
| Moyo (2012)            | Penicillin resistance and serotype distribution of Streptococcus pneumoniae in nasopharyngeal carrier children under 5 years of age in Dar es Salaam, Tanzania. <i>Journal of Medical Microbiology</i> 61                                                           | 2010 | Tanzania      | 834 | Africa   | CS    | Outp. | No  | <5y   | <1     | Unknown | 27  | 63    | 43%   |
|                        |                                                                                                                                                                                                                                                                     | 2010 | Tanzania      | 834 | Africa   | CS    | Outp. | No  | <5y   | 1–1    | 1       | 28  | 73    | 38%   |
|                        |                                                                                                                                                                                                                                                                     | 2010 | Tanzania      | 834 | Africa   | CS    | Outp. | No  | <5y   | 2–4    | Unknown | 50  | 164   | 30%   |
| Müller-Graf (1999)     | Population biology of Streptococcus pneumoniae isolated from oropharyngeal carriage and invasive disease. <i>Microbiology</i> 145 (11)                                                                                                                              | 2006 | Poland        | 616 | Europe   | CS    | Unkn. | No  | <5y   | 2–5    | Unknown | 13  | 95    | 14%   |
| Nackers (2017)         | Carriage prevalence and serotype distribution of Streptococcus pneumoniae prior to 10-valent pneumococcal vaccine introduction: A population-based cross-sectional study in South Western Uganda, 2014. <i>Vaccine</i> 35 (39)                                      | 2014 | Uganda        | 800 | Africa   | CS    | Rand. | No  | <5y   | 0–1    | Unknown | 86  | 205   | 42%   |
|                        |                                                                                                                                                                                                                                                                     | 2014 | Uganda        | 800 | Africa   | CS    | Rand. | No  | <5y   | 1–2    | Unknown | 78  | 182   | 43%   |
|                        |                                                                                                                                                                                                                                                                     | 2014 | Uganda        | 800 | Africa   | CS    | Rand. | No  | <5y   | 2–4    | Unknown | 74  | 217   | 34%   |
|                        |                                                                                                                                                                                                                                                                     | 2014 | Uganda        | 800 | Africa   | CS    | Rand. | No  | 5–17y | 5–14   | Unknown | 68  | 417   | 16%   |
|                        |                                                                                                                                                                                                                                                                     | 2014 | Uganda        | 800 | Africa   | CS    | Rand. | No  | 18+y  | ≥30    | Unknown | 2   | 208   | 1%    |
|                        |                                                                                                                                                                                                                                                                     | 2014 | Uganda        | 800 | Africa   | CS    | Rand. | No  | 18+y  | 15–29  | Unknown | 1   | 117   | 1%    |
| Neves (2013)           | Nasopharyngeal carriage, serotype distribution and antimicrobial resistance of Streptococcus pneumoniae among children from Brazil before the introduction of the 10-valent conjugate vaccine. <i>BMC Infectious Diseases</i> 13                                    | 2010 | Brazil        | 76  | Americas | CS    | Outp. | No  | <5y   | <1     | 0       | 11  | 37    | 30%   |
|                        |                                                                                                                                                                                                                                                                     | 2010 | Brazil        | 76  | Americas | CS    | Outp. | No  | <5y   | 1–1    | 1       | 20  | 38    | 53%   |
|                        |                                                                                                                                                                                                                                                                     | 2010 | Brazil        | 76  | Americas | CS    | Outp. | No  | <5y   | 2–4    | Unknown | 74  | 124   | 60%   |
|                        |                                                                                                                                                                                                                                                                     | 2010 | Brazil        | 76  | Americas | CS    | Outp. | No  | <5y   | 5–5    | 5       | 16  | 43    | 37%   |
| Neves (2018)           | Population structure of Streptococcus pneumoniae colonizing children before and after universal use of pneumococcal conjugate vaccines in Brazil: Emergence and expansion of the MDR serotype 6C-CC386 lineage. <i>Journal of Antimicrobial Chemotherapy</i> 73 (5) | 2010 | Brazil        | 76  | Americas | CS    | Unkn. | No  | <5y   | 0–6    | 3       | 102 | Unkn. |       |
| Niedzielski (2012)     | Distribution of vaccine serotypes among Streptococcus pneumoniae colonizing the upper respiratory tract in healthy pre-school children in south-east Poland. <i>Otolaryngologia Polska</i> 66 (6)                                                                   | 2002 | Poland        | 616 | Europe   | Long. | Unkn. | No  | <5y   | 3–5    | Unknown | 342 | 933   | 37%   |
| Nissinen (1995)        | Antimicrobial resistance of Streptococcus pneumoniae in Finland, 1987-1990. <i>Clinical Infectious Diseases</i> 20 (5)                                                                                                                                              | 1987 | Finland       | 246 | Europe   | CS    | Outp. | No  | <5y   | 3–6    | Unknown |     |       | Unkn. |
| O'Brien (2006)         | Effect of community-wide conjugate pneumococcal vaccine use in infancy on nasopharyngeal carriage through 3 years of age: a cross-sectional study in a high-risk population. <i>Clinical Infectious Diseases</i> 43                                                 | 1997 | United States | 840 | Americas | Long. | Trial | Yes | <5y   | 0–1    | 1       | 6   | 8     | 75%   |
|                        |                                                                                                                                                                                                                                                                     | 1997 | United States | 840 | Americas | Long. | Trial | Yes | <5y   | 2–4    | Unknown | 163 | 262   | 62%   |
|                        |                                                                                                                                                                                                                                                                     | 1998 | United States | 840 | Americas | Long. | Trial | Yes | <5y   | <1     | 0       | 175 | 262   | 67%   |
|                        |                                                                                                                                                                                                                                                                     | 1998 | United States | 840 | Americas | Long. | Trial | Yes | <5y   | 0–6    | Unknown | 63  | 96    | 66%   |
|                        |                                                                                                                                                                                                                                                                     | 1998 | United States | 840 | Americas | Long. | Trial | Yes | <5y   | 1–1    | 1       | 147 | 239   | 62%   |
|                        |                                                                                                                                                                                                                                                                     | 1998 | United States | 840 | Americas | Long. | Trial | Yes | <5y   | 1–1    | 1       | 154 | 250   | 62%   |
|                        |                                                                                                                                                                                                                                                                     | 1998 | United States | 840 | Americas | Long. | Trial | Yes | <5y   | 1–6    | Unknown | 79  | 120   | 66%   |

|                     |                                                                                                                                                                                                                                                                            |      |                         |       |          |       |       |     |      |       |         |     |      |     |
|---------------------|----------------------------------------------------------------------------------------------------------------------------------------------------------------------------------------------------------------------------------------------------------------------------|------|-------------------------|-------|----------|-------|-------|-----|------|-------|---------|-----|------|-----|
| O'Brien (2007)      | Effect of pneumococcal conjugate vaccine on nasopharyngeal colonization among immunized and unimmunized children in a community-randomized trial. <i>Journal of Infectious Diseases</i> 196                                                                                | 1998 | United States           | 840   | Americas | Long. | Trial | Yes | <5y  | 1–6   | Unknown | 58  | 100  | 58% |
|                     |                                                                                                                                                                                                                                                                            | 1999 | United States           | 840   | Americas | Long. | Trial | Yes | <5y  | <1    | Unknown | 113 | 280  | 40% |
| Ochoa (2005)        | Penicillin resistance and serotypes/serogroups of <i>Streptococcus pneumoniae</i> in nasopharyngeal carrier children younger than 2 years in Lima, Peru. <i>Diagnostic Microbiology and Infectious Disease</i> 52                                                          | 1997 | Peru                    | 604   | Americas | CS    | Outp. | No  | <5y  | <1    | Unknown | 66  | 170  | 39% |
|                     |                                                                                                                                                                                                                                                                            | 2001 | Peru                    | 604   | Americas | CS    | Outp. | No  | <5y  | <1    | 0       | 65  | 226  | 29% |
|                     |                                                                                                                                                                                                                                                                            | 2003 | Peru                    | 604   | Americas | CS    | Outp. | No  | <5y  | 0–1   | 1       | 80  | 270  | 30% |
| Otsuka (2013)       | Individual Risk Factors Associated With Nasopharyngeal Colonization With <i>Streptococcus pneumoniae</i> and <i>Haemophilus influenzae</i> : A Japanese Birth Cohort Study. <i>Pediatric Infectious Disease Journal</i> 32                                                 | 2008 | Japan                   | 392   | Asia     | Long. | Outp. | No  | <5y  | <1    | 0       | 121 | 334  | 36% |
|                     |                                                                                                                                                                                                                                                                            | 2008 | Japan                   | 392   | Asia     | Long. | Outp. | No  | <5y  | <1    | 0       | 92  | 334  | 28% |
|                     |                                                                                                                                                                                                                                                                            | 2008 | Japan                   | 392   | Asia     | Long. | Outp. | No  | <5y  | <1    | 0       | 59  | 341  | 17% |
|                     |                                                                                                                                                                                                                                                                            | 2008 | Japan                   | 392   | Asia     | Long. | Outp. | No  | <5y  | 1–1   | 1.5     | 156 | 324  | 48% |
| 2008                | Japan                                                                                                                                                                                                                                                                      | 392  | Asia                    | Long. | Outp.    | No    | <5y   | 3–3 | 3    | 86    | 191     | 45% |      |     |
| Ousmane (2017)      | Serotype Distribution and Antimicrobial Sensitivity Profile of <i>Streptococcus pneumoniae</i> Carried in Healthy Toddlers before PCV13 Introduction in Niamey, Niger. <i>PLOS ONE</i> 12 (1)                                                                              | 2007 | Niger                   | 562   | Africa   | CS    | Outp. | No  | <5y  | 0–2   | Unknown | 654 | 1200 | 55% |
| Palmu (2012)        | A longitudinal study of <i>Streptococcus pneumoniae</i> carriage in a cohort of infants and their mothers on the Thailand-Myanmar border. <i>Scandinavian Journal of Infectious Diseases</i> 44 (6)                                                                        | 2007 | Thailand                | 764   | Asia     | Long. | Outp. | No  | <5y  | <1    | 0       | 91  | 232  | 39% |
| Palmu (2012)        | Nasopharyngeal carriage of <i>Streptococcus pneumoniae</i> and pneumococcal urine antigen test in healthy elderly subjects. <i>Scandinavian Journal of Infectious Diseases</i> 44 (6)                                                                                      | 2003 | Finland                 | 246   | Europe   | CS    | Unkn. | No  | 18+y | 65–92 | 70      | 31  | 590  | 5%  |
| Paraskakis (2006)   | Serotypes and antimicrobial susceptibilities of 1033 pneumococci isolated from children in Greece during 2001-2004. <i>Clinical Microbiology and Infection</i> 12 (5)                                                                                                      | 2003 | Greece                  | 300   | Europe   | CS    | Unkn. | No  | <5y  | 3–6   | Unknown | 206 | 873  | 24% |
| Park (2008)         | Impact of conjugate vaccine on transmission of antimicrobial-resistant <i>Streptococcus pneumoniae</i> among Alaskan children. <i>Pediatric Infectious Disease Journal</i> 27                                                                                              | 2000 | United States           | 840   | Americas | CS    | Outp. | No  | <5y  | <1    | Unknown | 37  | 108  | 34% |
|                     |                                                                                                                                                                                                                                                                            | 2000 | United States           | 840   | Americas | CS    | Outp. | No  | <5y  | 1–1   | Unknown | 56  | 127  | 44% |
|                     |                                                                                                                                                                                                                                                                            | 2000 | United States           | 840   | Americas | CS    | Outp. | No  | <5y  | 2–4   | Unknown | 79  | 216  | 37% |
| Peñuela (1999)      | Colonización nasofaríngea y resistencia antimicrobiana de <i>Streptococcus pneumoniae</i> en niños de una guardería en Santa Fe de Bogotá. <i>Biomedica</i> 19                                                                                                             | 1997 | Colombia                | 170   | Americas | Long. | Unkn. | No  | <5y  | 0–1   | Unknown | 51  | 82   | 62% |
| Petrosillo (2002)   | Prevalence, determinants, and molecular epidemiology of <i>Streptococcus pneumoniae</i> isolates colonizing the nasopharynx of healthy children in Rome. <i>European Journal of Clinical Microbiology and Infectious Diseases</i> 21                                       | 1999 | Italy                   | 380   | Europe   | CS    | Unkn. | No  | <5y  | 0–5   | Unknown | 91  | 610  | 15% |
| Principi (2002)     | Nasopharyngeal carriage of <i>Streptococcus pneumoniae</i> in healthy children: implications for the use of heptavalent pneumococcal conjugate vaccine. <i>Emerging Infectious Diseases</i> 8                                                                              | 2000 | Italy                   | 380   | Europe   | CS    | Unkn. | No  | <5y  | 0–6   | Unknown | 242 | 2799 | 9%  |
| Prymula (2009)      | Effect of vaccination with pneumococcal capsular polysaccharides conjugated to <i>Haemophilus influenzae</i> -derived protein D on nasopharyngeal carriage of <i>Streptococcus pneumoniae</i> and <i>H. influenzae</i> in children under 2 years of age. <i>Vaccine</i> 28 | 2004 | Czechia                 | 203   | Europe   | CS    | Trial | No  | <5y  | 0–2   | 1       | 39  | 175  | 22% |
| Prymula (2011)      | Impact of the 10-valent pneumococcal non-typeable <i>Haemophilus influenzae</i> Protein D conjugate vaccine (PHiD-CV) on bacterial nasopharyngeal carriage. <i>Vaccine</i> 29                                                                                              | 2007 | Czechia                 | 203   | Europe   | CS    | Trial | No  | <5y  | 1–1   | 1       | 161 | 336  | 48% |
| Raman (2017)        | Demographic profile of healthy children with nasopharyngeal colonisation of <i>Streptococcus pneumoniae</i> : A research paper. <i>Indian Journal of Medical Microbiology</i> 35 (4)                                                                                       | 2012 | India                   | 356   | Asia     | CS    | Outp. | No  | <5y  | 0.5–5 | Unknown | 45  | 450  | 10% |
| Rashid (2013)       | Oro-pharyngeal carriage and antimicrobial susceptibility of <i>Streptococcus pneumoniae</i> from healthy children. <i>Internet Journal of Microbiology</i> 11 (1)                                                                                                          | 2010 | Malaysia                | 458   | Asia     | CS    | Unkn. | No  | <5y  | 1–2   | Unknown | 2   | 65   | 3%  |
| Raymond (2000)      | Sequential colonization by <i>Streptococcus pneumoniae</i> of healthy children living in an orphanage. <i>Journal of Infectious Diseases</i> 181 (6)                                                                                                                       | 1996 | France                  | 250   | Europe   | Long. | Unkn. | No  | <5y  | 0–1   | Unknown | 167 | 289  | 58% |
| Raymond (2002)      | Factors influencing <i>Streptococcus pneumoniae</i> carriage. <i>Medecine et Maladies Infectieuses</i> 32                                                                                                                                                                  | 1996 | France                  | 250   | Europe   | Long. | Unkn. | No  | <5y  | 0–2   | Unknown | 111 | 852  | 13% |
| Regev-Yochay (2004) | Nasopharyngeal carriage of <i>Streptococcus pneumoniae</i> by adults and children in community and family settings. <i>Clinical Infectious Diseases</i> 38                                                                                                                 | 2001 | Israel                  | 376   | Asia     | CS    | Outp. | No  | <5y  | 0–6   | Unknown | 214 | 404  | 53% |
|                     |                                                                                                                                                                                                                                                                            | 2001 | Israel                  | 376   | Asia     | CS    | Outp. | No  | 18+y | ≥18   | Unknown | 48  | 1300 | 4%  |
|                     |                                                                                                                                                                                                                                                                            | 2009 | Palestinian Territories | 275   | Asia     | CS    | Rand. | Yes | <5y  | 0–5   | 2       | 189 | 379  | 50% |

|                     |                                                                                                                                                                                                                                    |      |                          |     |          |       |       |     |       |            |         |     |      |       |
|---------------------|------------------------------------------------------------------------------------------------------------------------------------------------------------------------------------------------------------------------------------|------|--------------------------|-----|----------|-------|-------|-----|-------|------------|---------|-----|------|-------|
| Regev-Yochay (2012) | Streptococcus pneumoniae carriage in the Gaza strip. PLOS ONE 7                                                                                                                                                                    | 2009 | Palestinian Territories  | 275 | Asia     | CS    | Rand. | Yes | 18+y  | ≥18        | Unknown | 34  | 379  | 9%    |
| Reis (2008)         | Transmission of Streptococcus pneumoniae in an urban slum community. Journal of Infection 57                                                                                                                                       | 2000 | Brazil                   | 76  | Americas | CS    | Unkn. | No  | <5y   | <1         | Unknown | 6   | 8    | 75%   |
|                     |                                                                                                                                                                                                                                    | 2000 | Brazil                   | 76  | Americas | CS    | Unkn. | No  | <5y   | 1–1        | Unknown | 4   | 7    | 57%   |
|                     |                                                                                                                                                                                                                                    | 2000 | Brazil                   | 76  | Americas | CS    | Unkn. | No  | <5y   | 2–4        | Unknown | 23  | 35   | 66%   |
|                     |                                                                                                                                                                                                                                    | 2000 | Brazil                   | 76  | Americas | CS    | Unkn. | No  | <5y   | Unreported | Unknown | 19  | 117  | 16%   |
|                     |                                                                                                                                                                                                                                    | 2000 | Brazil                   | 76  | Americas | CS    | Unkn. | No  | 5–17y | 5–17       | Unknown | 52  | 95   | 55%   |
| Rey (2002)          | Antimicrobial susceptibility and serotypes of nasopharyngeal Streptococcus pneumoniae in children with pneumonia and in children attending day-care centres in Fortaleza, Brazil. International Journal of Antimicrobial Agents 20 | 1998 | Brazil                   | 76  | Americas | CS    | Unkn. | No  | <5y   | 1–4        | Unknown | 269 | 374  | 72%   |
| Roca (2006)         | Serotype distribution and antibiotic susceptibility of invasive and nasopharyngeal isolates of Streptococcus pneumoniae among children in rural Mozambique. Tropical Medicine and International Health 11                          | 2003 | Mozambique               | 508 | Africa   | CS    | Outp. | No  | <5y   | 0–4        | 1       | 192 | 248  | 77%   |
| Roca (2011)         | Effects of community-wide vaccination with PCV-7 on pneumococcal nasopharyngeal carriage in the Gambia: a cluster-randomized trial. PLOS Medicine 8                                                                                | 2003 | Gambia                   | 270 | Africa   | CS    | Trial | No  | <5y   | 2–4        | 3       | 197 | 219  | 90%   |
|                     |                                                                                                                                                                                                                                    | 2003 | Gambia                   | 270 | Africa   | CS    | Trial | No  | 5–17y | 5–17       | Unknown | 741 | 896  | 83%   |
|                     |                                                                                                                                                                                                                                    | 2003 | Gambia                   | 270 | Africa   | CS    | Trial | No  | 18+y  | ≥60        | Unknown | 106 | 206  | 51%   |
|                     |                                                                                                                                                                                                                                    | 2003 | Gambia                   | 270 | Africa   | CS    | Trial | No  | 18+y  | 18–59      | Unknown | 444 | 773  | 57%   |
| Roche (2007)        | Prevalence of nasopharyngeal carriage of pneumococcus in preschool children attending day care in London. Archives of Disease in Childhood 92                                                                                      | 2003 | United Kingdom           | 826 | Europe   | CS    | Unkn. | No  | <5y   | <1         | Unknown |     |      | Unkn. |
|                     |                                                                                                                                                                                                                                    | 2003 | United Kingdom           | 826 | Europe   | CS    | Unkn. | No  | <5y   | 1–1        | 1       |     |      | Unkn. |
|                     |                                                                                                                                                                                                                                    | 2003 | United Kingdom           | 826 | Europe   | CS    | Unkn. | No  | <5y   | 2–4        | Unknown |     |      | Unkn. |
| Ronchetti (1999)    | Resistance patterns of Streptococcus pneumoniae from children in central Italy. European Journal of Clinical Microbiology and Infectious Diseases 18 (5)                                                                           | 1997 | Italy                    | 380 | Europe   | CS    | Outp. | No  | <5y   | 3–5        | Unknown | 121 | 1146 | 11%   |
| Rosen (1996)        | Antibodies to pneumococcal polysaccharides in human milk: lack of relationship to colonization and acute otitis media. Pediatric Infectious Disease Journal 15 (6)                                                                 | 1995 | Sweden                   | 752 | Europe   | Long. | Rand. | No  | <5y   | <1         | Unknown | 113 | 423  | 27%   |
|                     |                                                                                                                                                                                                                                    | 1995 | Sweden                   | 752 | Europe   | Long. | Rand. | No  | <5y   | <1         | 0       | 52  | 448  | 12%   |
|                     |                                                                                                                                                                                                                                    | 1995 | Sweden                   | 752 | Europe   | Long. | Rand. | No  | <5y   | <1         | Unknown | 115 | 404  | 28%   |
| Rowe (2000)         | Antimicrobial resistance of nasopharyngeal isolates of Streptococcus pneumoniae and Haemophilus influenzae from children in the Central African Republic. Pediatric Infectious Disease Journal 19                                  | 1995 | Central African Republic | 140 | Africa   | CS    | Outp. | No  | <5y   | <1         | 0       | 32  | 39   | 82%   |
|                     |                                                                                                                                                                                                                                    | 1995 | Central African Republic | 140 | Africa   | CS    | Outp. | No  | <5y   | 1–1        | Unknown | 27  | 36   | 75%   |
|                     |                                                                                                                                                                                                                                    | 1995 | Central African Republic | 140 | Africa   | CS    | Outp. | No  | <5y   | 2–4        | Unknown | 23  | 31   | 74%   |
| Rusen (1997)        | Nasopharyngeal pneumococcal colonization among Kenyan children: antibiotic resistance, strain types and associations with human immunodeficiency virus type 1 infection. Pediatric Infectious Disease Journal 16 (7)               | 1990 | Kenya                    | 404 | Africa   | CS    | Outp. | No  | <5y   | 0–5        | Unknown | 92  | 207  | 44%   |
| Russell (2006)      | Pneumococcal nasopharyngeal carriage and patterns of penicillin resistance in young children in Fiji. Annals of Tropical Paediatrics 26 (3)                                                                                        | 2003 | Fiji                     | 242 | Oceania  | CS    | Outp. | No  | <5y   | 0–1        | 0       | 195 | 440  | 44%   |
| Russell (2010)      | Pneumococcal nasopharyngeal carriage following reduced doses of a 7-valent pneumococcal conjugate vaccine and a 23-valent pneumococcal polysaccharide vaccine booster. Clinical and Vaccine Immunology 17                          | 2004 | Fiji                     | 242 | Oceania  | Long. | Trial | No  | <5y   | <1         | 0       | 54  | 120  | 45%   |
|                     |                                                                                                                                                                                                                                    | 2004 | Fiji                     | 242 | Oceania  | Long. | Trial | No  | <5y   | <1         | Unknown | 49  | 121  | 40%   |
|                     |                                                                                                                                                                                                                                    | 2004 | Fiji                     | 242 | Oceania  | Long. | Trial | No  | <5y   | 1–1        | 1       | 50  | 122  | 41%   |
| Sá-Leao (2008)      | High rates of transmission of and colonization by Streptococcus pneumoniae and Haemophilus influenzae within a day care center revealed in a longitudinal study. Journal of Clinical Microbiology 46 (1)                           | 1998 | Portugal                 | 620 | Europe   | Long. | Unkn. | No  | <5y   | 1–3        | Unknown | 254 | 414  | 61%   |
| Saeed (2011)        | Carriage rates, circulating serotypes and antibiotic resistance among Streptococcus pneumoniae in healthy infants in Yei, South Sudan. South Sudan Medical Journal 4                                                               | 2000 | South Sudan              | 728 | Africa   | CS    | Outp. | No  | <5y   | 0–1        | Unknown | 14  | 38   | 37%   |

|                   |                                                                                                                                                                                                                                     |      |                |     |        |       |       |       |         |      |         |      |      |     |
|-------------------|-------------------------------------------------------------------------------------------------------------------------------------------------------------------------------------------------------------------------------------|------|----------------|-----|--------|-------|-------|-------|---------|------|---------|------|------|-----|
| Safari (2012)     | Nasopharyngeal colonization of <i>Streptococcus pneumoniae</i> in elderly people, in Jakarta, Indonesia. <i>International Journal of Infectious Diseases</i> 16                                                                     | 2010 | Indonesia      | 360 | Asia   | CS    | Outp. | No    | 18+y    | ≥60  | Unknown | 4    | 155  | 3%  |
| Saha (2003)       | Comparison of antibiotic resistance and serotype composition of carriage and invasive pneumococci among Bangladeshi children: implications for treatment policy and vaccine formulation. <i>Journal of Clinical Microbiology</i> 41 | 1999 | Bangladesh     | 50  | Asia   | CS    | Rand. | No    | <5y     | 0–5  | Unknown | 1301 | 2831 | 46% |
| Salt (2007)       | Social mixing with other children during infancy enhances antibody response to a pneumococcal conjugate vaccine in early childhood. <i>Clinical and Vaccine Immunology</i> 14 (5)                                                   | 2003 | United Kingdom | 826 | Europe | CS    | Rand. | No    | <5y     | 1–1  | Unknown | 99   | 159  | 62% |
| Salter (2017)     | A longitudinal study of the infant nasopharyngeal microbiota: The effects of age, illness and antibiotic use in a cohort of South East Asian children. <i>PLOS Neglected Tropical Diseases</i> 11 (10)                              | 2007 | Thailand       | 764 | Asia   | Long. | Unkn. | No    | <5y     | 0–2  | 1       | 468  | 517  | 91% |
| Sanders (2009)    | Effect of reduced-dose schedules with 7-valent pneumococcal conjugate vaccine on nasopharyngeal pneumococcal carriage in children: A randomized controlled trial. <i>Journal of the American Medical Association</i> 302            | 2005 | Netherlands    | 528 | Europe | Long. | Trial | No    | <5y     | 1–1  | 1       | 214  | 319  | 67% |
|                   |                                                                                                                                                                                                                                     | 2005 | Netherlands    | 528 | Europe | Long. | Trial | No    | <5y     | 1–1  | 1       | 215  | 317  | 68% |
|                   |                                                                                                                                                                                                                                     | 2005 | Netherlands    | 528 | Europe | Long. | Trial | No    | <5y     | 1–2  | Unknown | 211  | 321  | 66% |
| Sandgen (2004)    | Effect of clonal and serotype-specific properties on the invasive capacity of <i>Streptococcus pneumoniae</i> . <i>Journal of Infectious Diseases</i> 189 (5)                                                                       | 1997 | Sweden         | 752 | Europe | CS    | Unkn. | No    | <5y     | 1–6  | Unknown | 246  | 611  | 40% |
| Schaumburg (2013) | Streptococcus pneumoniae colonization in remote African Pygmies. <i>Transactions of the Royal Society of Tropical Medicine and Hygiene</i> 107                                                                                      | 2011 | Gabon          | 266 | Africa | CS    | Rand. | Yes   | <5y     | <1   | Unknown | 0    | 1    | 0%  |
|                   |                                                                                                                                                                                                                                     | 2011 | Gabon          | 266 | Africa | CS    | Rand. | Yes   | <5y     | 1–1  | Unknown | 0    | 1    | 0%  |
|                   |                                                                                                                                                                                                                                     | 2011 | Gabon          | 266 | Africa | CS    | Rand. | Yes   | <5y     | 2–4  | Unknown | 15   | 19   | 79% |
|                   |                                                                                                                                                                                                                                     | 2011 | Gabon          | 266 | Africa | CS    | Rand. | Yes   | 5–17y   | 5–17 | Unknown | 14   | 32   | 44% |
|                   |                                                                                                                                                                                                                                     | 2011 | Gabon          | 266 | Africa | CS    | Rand. | Yes   | 18+y    | ≥60  | Unknown | 2    | 5    | 40% |
| 2011              | Gabon                                                                                                                                                                                                                               | 266  | Africa         | CS  | Rand.  | Yes   | 18+y  | 18–59 | Unknown | 7    | 45      | 16%  |      |     |
| Scott (2008)      | The descriptive epidemiology of <i>Streptococcus pneumoniae</i> and <i>Haemophilus influenzae</i> nasopharyngeal carriage in children and adults in Kilifi district, Kenya. <i>Pediatric Infectious Disease Journal</i> 27          | 2004 | Kenya          | 404 | Africa | CS    | Rand. | No    | <5y     | 0–4  | 2       | 198  | 349  | 57% |
| Scott (2012)      | Rates of acquisition of pneumococcal colonization and transmission probabilities, by serotype, among newborn infants in Kilifi District, Kenya. <i>Clinical Infectious Diseases</i> 55                                              | 2006 | Kenya          | 404 | Africa | Long. | Outp. | No    | 18+y    | ≥18  | Unknown | 205  | 2428 | 8%  |
| Scott (2012)      | The prevalence and risk factors for pneumococcal colonization of the nasopharynx among children in Kilifi District, Kenya. <i>PLOS ONE</i> 7                                                                                        | 2006 | Kenya          | 404 | Africa | CS    | Rand. | No    | <5y     | 1–4  | Unknown | 1868 | 2840 | 66% |
| Sener (1998)      | Rate of carriage, serotype distribution and penicillin resistance of <i>Streptococcus pneumoniae</i> in healthy children. <i>Zentralblatt für Bakteriologie</i> 288 (3)                                                             | 1995 | Turkey         | 792 | Asia   | CS    | Outp. | No    | <5y     | 1–4  | Unknown | 71   | 248  | 29% |
| Shaumburg (2013)  | Carriage of encapsulated bacteria in Gabonese children with sickle cell anaemia. <i>Clinical Microbiology and Infection</i> 19                                                                                                      | 2010 | Gabon          | 266 | Africa | CS    | Outp. | No    | <5y     | <1   | Unknown | 0    | 2    | 0%  |
|                   |                                                                                                                                                                                                                                     | 2010 | Gabon          | 266 | Africa | CS    | Outp. | No    | <5y     | 1–1  | Unknown | 2    | 8    | 25% |
|                   |                                                                                                                                                                                                                                     | 2010 | Gabon          | 266 | Africa | CS    | Outp. | No    | <5y     | 2–4  | Unknown | 9    | 42   | 21% |
|                   |                                                                                                                                                                                                                                     | 2010 | Gabon          | 266 | Africa | CS    | Outp. | No    | 5–17y   | 5–17 | Unknown | 8    | 90   | 9%  |
| Simões (2011)     | Clonal evolution leading to maintenance of antibiotic resistance rates among colonizing pneumococci in the PCV7 era in Portugal. <i>Journal of Clinical Microbiology</i> 49 (8)                                                     | 2001 | Portugal       | 620 | Europe | CS    | Unkn. | No    | <5y     | <1   | 0       | 22   | 30   | 73% |
|                   |                                                                                                                                                                                                                                     | 2001 | Portugal       | 620 | Europe | CS    | Unkn. | No    | <5y     | 1–1  | 1       | 45   | 60   | 75% |
|                   |                                                                                                                                                                                                                                     | 2001 | Portugal       | 620 | Europe | CS    | Unkn. | No    | <5y     | 2–4  | Unknown | 259  | 399  | 65% |
|                   |                                                                                                                                                                                                                                     | 2001 | Portugal       | 620 | Europe | CS    | Unkn. | No    | 5–17y   | 5–6  | Unknown | 139  | 228  | 61% |
| Skovberg (2013)   | Low rate of pneumococci non-susceptible to penicillin in healthy Swedish toddlers. <i>Scandinavian Journal of Infectious Diseases</i> 45                                                                                            | 2004 | Sweden         | 752 | Europe | CS    | Outp. | No    | <5y     | 1–1  | Unknown | 297  | 663  | 45% |
| Sleeman (2005)    | Acquisition of <i>Streptococcus pneumoniae</i> and nonspecific morbidity in infants and their families: a cohort study. <i>Pediatric Infectious Disease Journal</i> 24 (2)                                                          | 1999 | United Kingdom | 826 | Europe | Long. | Rand. | No    | <5y     | <1   | Unknown | 518  | 1907 | 27% |
| Slotved (2013)    | Penicillin resistance and serotype distribution of <i>Streptococcus pneumoniae</i> in Ghanaian children less than six years of age. <i>BMC Infectious Diseases</i> 13                                                               | 2011 | Ghana          | 288 | Africa | CS    | Unkn. | No    | <5y     | <1   | 0       | 6    | 7    | 86% |
|                   |                                                                                                                                                                                                                                     | 2011 | Ghana          | 288 | Africa | CS    | Unkn. | No    | <5y     | 1–1  | 1       | 33   | 73   | 45% |
|                   |                                                                                                                                                                                                                                     | 2011 | Ghana          | 288 | Africa | CS    | Unkn. | No    | <5y     | 2–5  | 3       | 232  | 341  | 68% |

|                         |                                                                                                                                                                                                                                                                                 |      |               |     |          |       |       |     |         |            |         |     |       |     |
|-------------------------|---------------------------------------------------------------------------------------------------------------------------------------------------------------------------------------------------------------------------------------------------------------------------------|------|---------------|-----|----------|-------|-------|-----|---------|------------|---------|-----|-------|-----|
| Sluijter (1998)         | Molecular characterization of pneumococcal nasopharynx isolates collected from children during their first 2 years of life. <i>Journal of Clinical Microbiology</i> 36 (8)                                                                                                      | 1995 | Netherlands   | 528 | Europe   | Long. | Rand. | No  | <5y     | 0–2        | Unknown | 58  | 247   | 23% |
| Solorzano (2005)        | Prevalence of Streptococcus pneumoniae serotypes on nasopharyngeal colonization in children of Mexico City. Spanish Serotipos prevalantes de Streptococcus pneumoniae colonizadores de nasofaringe, en niños del Distrito Federal. <i>Salud Publica de Mexico</i> 47            | 2000 | Mexico        | 484 | Americas | CS    | Rand. | No  | <5y     | 0–5        | Unknown | 122 | 573   | 21% |
| Song (2001)             | Carriage of antibiotic-resistant pneumococci among Asian children: a multinational surveillance by the Asian Network for Surveillance of Resistant Pathogens (ANSORP). <i>Clinical Infectious Diseases</i> 32                                                                   | 1998 | China         | 156 | Asia     | CS    | Rand. | No  | <5y     | 0–4        | Unknown | 95  | 267   | 36% |
|                         |                                                                                                                                                                                                                                                                                 | 1998 | India         | 356 | Asia     | CS    | Rand. | No  | <5y     | 0–4        | Unknown | 77  | 227   | 34% |
|                         |                                                                                                                                                                                                                                                                                 | 1998 | Malaysia      | 458 | Asia     | CS    | Rand. | No  | <5y     | 0–4        | Unknown | 58  | 762   | 8%  |
|                         |                                                                                                                                                                                                                                                                                 | 1998 | Philippines   | 608 | Asia     | CS    | Rand. | No  | <5y     | 0–4        | Unknown | 95  | 307   | 31% |
|                         |                                                                                                                                                                                                                                                                                 | 1998 | Saudi Arabia  | 682 | Asia     | CS    | Rand. | No  | <5y     | 0–4        | Unknown | 26  | 830   | 3%  |
|                         |                                                                                                                                                                                                                                                                                 | 1998 | Singapore     | 702 | Asia     | CS    | Rand. | No  | <5y     | 0–4        | Unknown | 41  | 491   | 8%  |
|                         |                                                                                                                                                                                                                                                                                 | 1998 | South Korea   | 410 | Asia     | CS    | Rand. | No  | <5y     | 0–4        | Unknown | 62  | 500   | 12% |
|                         |                                                                                                                                                                                                                                                                                 | 1998 | Sri Lanka     | 144 | Asia     | CS    | Rand. | No  | <5y     | 0–4        | Unknown | 16  | 493   | 3%  |
|                         |                                                                                                                                                                                                                                                                                 | 1998 | Taiwan        | 158 | Asia     | CS    | Rand. | No  | <5y     | 0–4        | Unknown | 23  | 288   | 8%  |
|                         |                                                                                                                                                                                                                                                                                 | 1998 | Thailand      | 764 | Asia     | CS    | Rand. | No  | <5y     | 0–4        | Unknown | 165 | 503   | 33% |
| 1998                    | Vietnam                                                                                                                                                                                                                                                                         | 704  | Asia          | CS  | Rand.    | No    | <5y   | 0–4 | Unknown | 92         | 295     | 31% |       |     |
| Soraa (2011)            | Study of nasopharyngeal colonization by Streptococcus pneumoniae and its antibiotics resistance in healthy children less than 2 years of age in the Marrakech region (Morocco). (French). <i>Archives de Pediatrie</i> 18                                                       | 2008 | Morocco       | 504 | Africa   | CS    | Outp. | No  | <5y     | 0–1        | 1       | 302 | 660   | 46% |
| Stubbs (2005)           | Streptococcus pneumoniae and noncapsular Haemophilus influenzae nasal carriage and hand contamination in children - A comparison of two populations at risk of otitis media. <i>Pediatric Infectious Disease Journal</i> 24 (5)                                                 | NA   | Australia     | 36  | Oceania  | CS    | Rand. | Yes | <5y     | 0–3        | Unknown | 294 | Unkn. |     |
| Sulikowska (2003)       | The carriage of Streptococcus pneumoniae in the nasopharynx of children under 5 years of age in selected settings in Warsaw. <i>Polish Nosicielstwo nosogardlowe Streptococcus pneumoniae u dzieci do 5 roku zycia w wybranych srodowiskach w Warszawie. Pediatra Polska</i> 78 | 2000 | Poland        | 616 | Europe   | CS    | Unkn. | No  | <5y     | 1–5        | Unknown | 76  | 125   | 61% |
|                         |                                                                                                                                                                                                                                                                                 | 2001 | Poland        | 616 | Europe   | CS    | Unkn. | No  | <5y     | 1–5        | Unknown | 63  | 120   | 52% |
| Sun (2007)              | Epidemiological study of Streptococcus pneumoniae in the nasopharynx of healthy children under 5 years of age in Wuhan. (Chinese). <i>Zhonghua Er Ke Za Zhi. Chinese Journal of Pediatrics</i> 45                                                                               | 2003 | China         | 156 | Asia     | CS    | Unkn. | No  | <5y     | 0–4        | Unknown | 135 | 605   | 22% |
| Syrjanen (2001)         | Nasopharyngeal carriage of Streptococcus pneumoniae in Finnish children younger than 2 years old. <i>Journal of Infectious Diseases</i> 184                                                                                                                                     | 1994 | Finland       | 246 | Europe   | Long. | Rand. | No  | <5y     | 1–2        | Unknown | 649 | 3024  | 21% |
| Syrogiannopoulos (1997) | Resistance patterns of streptococcus pneumoniae from carriers attending day-care centers in southwestern Greece. <i>Clinical Infectious Diseases</i> 25                                                                                                                         | 1995 | Greece        | 300 | Europe   | CS    | Unkn. | No  | <5y     | 1–1        | Unknown | 9   | 20    | 45% |
|                         |                                                                                                                                                                                                                                                                                 | 1995 | Greece        | 300 | Europe   | CS    | Unkn. | No  | <5y     | 2–4        | Unknown | 96  | 236   | 41% |
|                         |                                                                                                                                                                                                                                                                                 | 1995 | Greece        | 300 | Europe   | CS    | Unkn. | No  | 5–17y   | 5–6        | Unknown | 27  | 82    | 33% |
| Syrogiannopoulos (2002) | Antimicrobial use and serotype distribution of nasopharyngeal Streptococcus pneumoniae isolates recovered from Greek children younger than 2 years old. <i>Clinical Infectious Diseases</i> 35                                                                                  | 1997 | United States | 840 | Americas | CS    | Outp. | No  | <5y     | 1–1        | Unknown | 395 | 1190  | 33% |
|                         |                                                                                                                                                                                                                                                                                 | 1997 | Greece        | 300 | Europe   | CS    | Outp. | No  | <5y     | <1         | Unknown | 371 | 1258  | 29% |
|                         |                                                                                                                                                                                                                                                                                 | 2005 | Greece        | 300 | Europe   | CS    | Unkn. | No  | <5y     | 1–1        | Unknown | 8   | 16    | 50% |
| Syrogiannopoulos (2008) | Impact of heptavalent pneumococcal conjugate vaccine on nasopharyngeal carriage of penicillin-resistant Streptococcus pneumoniae among day-care center attendees in central Greece. <i>Pediatric Infectious Disease Journal</i> 27                                              | 2005 | Greece        | 300 | Europe   | CS    | Unkn. | No  | <5y     | 2–4        | Unknown | 263 | 507   | 52% |
|                         |                                                                                                                                                                                                                                                                                 | 2005 | Greece        | 300 | Europe   | CS    | Unkn. | No  | 5–17y   | 5–6        | 5       | 50  | 147   | 34% |
| Takala (1996)           | Subtyping of common pediatric pneumococcal serotypes from invasive disease and pharyngeal carriage in Finland. <i>Journal of Infectious Diseases</i> 173 (1)                                                                                                                    | 1987 | Finland       | 246 | Europe   | CS    | Outp. | No  | <5y     | Unreported | 3       | 50  | Unkn. |     |
| Talarico (2010)         | Epidemiologic characteristics of streptococcus pneumoniae in Vietnam and implications for population vaccination. Doctoral dissertation, University of Michigan                                                                                                                 | 2006 | Vietnam       | 704 | Asia     | CS    | Rand. | No  | <5y     | 0–5        | Unknown | 42  | 104   | 40% |
|                         |                                                                                                                                                                                                                                                                                 | 2006 | Vietnam       | 704 | Asia     | CS    | Rand. | No  | 5–17y   | 6–17       | Unknown | 6   | 55    | 11% |
|                         |                                                                                                                                                                                                                                                                                 | 2006 | Vietnam       | 704 | Asia     | CS    | Rand. | No  | 18+y    | 18–86      | Unknown | 8   | 360   | 2%  |
|                         |                                                                                                                                                                                                                                                                                 | 2013 | Cuba          | 192 | Americas | CS    | Rand. | No  | <5y     | <1.5       | Unknown | 48  | 195   | 25% |
|                         |                                                                                                                                                                                                                                                                                 | 2013 | Cuba          | 192 | Americas | CS    | Rand. | No  | <5y     | 0.5–1      | Unknown | 75  | 365   | 21% |

|                           |                                                                                                                                                                                                                                                                 |      |               |     |          |       |       |     |       |       |         |     |      |       |
|---------------------------|-----------------------------------------------------------------------------------------------------------------------------------------------------------------------------------------------------------------------------------------------------------------|------|---------------|-----|----------|-------|-------|-----|-------|-------|---------|-----|------|-------|
| Toledo (2017)             | Prevalence of Pneumococcal Nasopharyngeal Carriage Among Children 2-18 Months of Age: Baseline Study Pre Introduction of Pneumococcal Vaccination in Cuba. <i>Pediatric Infectious Disease Journal</i> 36 (1)                                                   | 2013 | Cuba          | 192 | Americas | CS    | Rand. | No  | <5y   | 1-1.5 | Unknown | 89  | 420  | 21%   |
| Tóthpál (2012)            | Nasal carriage of streptococcus pneumoniae among Hungarian children before the wide use of the conjugate vaccine. <i>Acta Microbiologica et Immunologica Hungarica</i> 59 (1)                                                                                   | 2009 | Hungary       | 348 | Europe   | CS    | Unkn. | No  | <5y   | 3-6   | Unknown | 135 | 358  | 38%   |
| Trojanek (2013)           | Pneumococcal urinary antigen positivity in healthy colonized children: is it age dependent?. <i>Wiener Klinische Wochenschrift</i> 125                                                                                                                          | 2010 | Czechia       | 203 | Europe   | CS    | Unkn. | No  | 5-17y | 3-6   | 5       | 105 | 197  | 53%   |
| Trucco (1996)             | Penicillin resistant Streptococcus pneumoniae among children attending day care centers. Spanish Prevalencia de Streptococcus pneumoniae resistente a penicilina en niños que asisten a jardines infantiles en Santiago. <i>Revista Chilena de Pediatría</i> 67 | 1994 | Chile         | 152 | Americas | CS    | Unkn. | No  | <5y   | 1-4   | Unknown | 120 | 200  | 60%   |
| Tsolia (1999)             | Prevalence and patterns of resistance of Streptococcus pneumoniae strains isolated from carriers attending day care centers in the area of Athens. <i>Microbial Drug Resistance</i> 5                                                                           | 1997 | Greece        | 300 | Europe   | CS    | Unkn. | No  | <5y   | 0-6   | 4       | 136 | 382  | 36%   |
| Turner (2012)             | A longitudinal study of Streptococcus pneumoniae carriage in a cohort of infants and their mothers on the Thailand-Myanmar border. <i>PLOS ONE</i> 7                                                                                                            | 2007 | Thailand      | 764 | Asia     | Long. | Outp. | No  | <5y   | <1    | 0       | 162 | 196  | 83%   |
|                           |                                                                                                                                                                                                                                                                 | 2007 | Thailand      | 764 | Asia     | Long. | Outp. | No  | <5y   | <1    | 0       | 149 | 184  | 81%   |
|                           |                                                                                                                                                                                                                                                                 | 2007 | Thailand      | 764 | Asia     | Long. | Outp. | No  | <5y   | 1-1   | 1       | 110 | 146  | 75%   |
|                           |                                                                                                                                                                                                                                                                 | 2007 | Thailand      | 764 | Asia     | Long. | Outp. | No  | <5y   | 1-1   | 1       | 119 | 154  | 77%   |
|                           |                                                                                                                                                                                                                                                                 | 2007 | Thailand      | 764 | Asia     | Long. | Outp. | No  | 18+y  | ≥18   | Unknown | 24  | 127  | 19%   |
|                           |                                                                                                                                                                                                                                                                 | 2007 | Thailand      | 764 | Asia     | Long. | Outp. | No  | 18+y  | ≥18   | Unknown | 50  | 179  | 28%   |
|                           |                                                                                                                                                                                                                                                                 | 2007 | Thailand      | 764 | Asia     | Long. | Outp. | No  | 18+y  | ≥18   | Unknown | 37  | 141  | 26%   |
|                           |                                                                                                                                                                                                                                                                 | 2007 | Thailand      | 764 | Asia     | Long. | Outp. | No  | 18+y  | ≥18   | Unknown | 45  | 192  | 23%   |
| Vakevainen (2010)         | Serotype-specific hyporesponsiveness to pneumococcal conjugate vaccine in infants carrying pneumococcus at the time of vaccination. <i>Journal of Pediatrics</i> 157                                                                                            | 2000 | Philippines   | 608 | Asia     | CS    | Rand. | No  | <5y   | <1    | Unknown | 297 | 1059 | 28%   |
| Veenhoven (2004)          | Nasopharyngeal pneumococcal carriage after combined pneumococcal conjugate and polysaccharide vaccination in children with a history of recurrent acute otitis media. <i>Clinical Infectious Diseases</i> 39                                                    | 1998 | Netherlands   | 528 | Europe   | CS    | Rand. | No  | <5y   | 1-2   | 1       | 41  |      | Unkn. |
|                           |                                                                                                                                                                                                                                                                 | 1999 | Netherlands   | 528 | Europe   | CS    | Rand. | No  | <5y   | 1-2   | 1       | 63  |      | Unkn. |
| Verani (2018)             | Nasopharyngeal carriage of Streptococcus pneumoniae among HIV-infected and - uninfected children <5 years of age before introduction of pneumococcal conjugate vaccine in Mozambique. <i>PLOS ONE</i> 13 (2)                                                    | 2012 | Mozambique    | 508 | Africa   | CS    | Unkn. | No  | <5y   | 0-5   | Unknown | 255 | 320  | 80%   |
| Wang (2003)               | Rate of nasopharyngeal carriage, antimicrobial resistance and serotype of Streptococcus pneumoniae among children in northern Taiwan. <i>Journal of Microbiology, Immunology and Infection</i> 36                                                               | 1998 | Taiwan        | 158 | Asia     | CS    | Outp. | No  | <5y   | 0-1   | Unknown | 24  | 180  | 13%   |
|                           |                                                                                                                                                                                                                                                                 | 1998 | Taiwan        | 158 | Asia     | CS    | Outp. | No  | <5y   | 2-5   | Unknown | 50  | 180  | 28%   |
|                           |                                                                                                                                                                                                                                                                 | 1998 | Taiwan        | 158 | Asia     | CS    | Outp. | No  | 5-17y | 6-14  | Unknown | 21  | 118  | 18%   |
| Warda (2013)              | Antibiotic resistance and serotype distribution of nasopharyngeal isolates of Streptococcus pneumoniae from children in Marrakech region (Morocco). <i>Journal of Infection and Public Health</i> 6 (6)                                                         | 2007 | Morocco       | 504 | Africa   | CS    | Outp. | No  | <5y   | 0-2   | 1       | 302 | 660  | 46%   |
| Wattal (2007)             | Nasopharyngeal carriage of Streptococcus pneumoniae. <i>Indian Journal of Pediatrics</i> 74 (10)                                                                                                                                                                | 2000 | India         | 356 | Asia     | CS    | Outp. | No  | <5y   | 1-3   | Unknown | 13  | 200  | 6%    |
| Xie (2018)                | A Cross-sectional Survey Assessing Carriage of Streptococcus pneumoniae in a Healthy Population in Xinjiang Uygur Autonomous Region of China. <i>Biomedical and Environmental Sciences</i> 31 (3)                                                               | 2015 | China         | 156 | Asia     | CS    | Unkn. | Yes | 5-17y | 0-53  | 11      | 361 | 513  | 70%   |
| Yagupsky (1998)           | Acquisition, carriage, and transmission of pneumococci with decreased antibiotic susceptibility in young children attending a day care facility in southern Israel. <i>Journal of Infectious Diseases</i> 177                                                   | 1993 | Israel        | 376 | Asia     | Long. | Unkn. | No  | <5y   | 1-3   | Unknown | 362 | 576  | 63%   |
| Yeh (2003)                | Heptavalent pneumococcal vaccine conjugated to outer membrane protein of Neisseria meningitidis serogroup b and nasopharyngeal carriage of Streptococcus pneumoniae in infants. <i>Vaccine</i> 21                                                               | 1995 | United States | 840 | Americas | CS    | Trial | No  | <5y   | 0-1   | 0       | 31  |      | Unkn. |
| Yen-Chen, Yien-Lin (2011) | Nasopharyngeal carriage of Streptococcus pneumoniae in Taiwan before and after the introduction of a conjugate vaccine. <i>Vaccine</i> 29                                                                                                                       | 2005 | Taiwan        | 158 | Asia     | CS    | Outp. | No  | <5y   | 0-5   | Unknown | 195 | 1506 | 13%   |
|                           |                                                                                                                                                                                                                                                                 | 2006 | Taiwan        | 158 | Asia     | CS    | Outp. | No  | <5y   | 0-5   | Unknown | 407 | 2633 | 15%   |
| Yoshida (2011)            | Association between nasopharyngeal load of Streptococcus pneumoniae, viral coinfection, and radiologically confirmed pneumonia in Vietnamese children. <i>Pediatric Infectious Disease Journal</i> 30                                                           | 2008 | Vietnam       | 704 | Asia     | CS    | Rand. | No  | <5y   | 0-4   | Unknown | 175 | 350  | 50%   |



|                   |                                                                                                                                                                                                                                                                                              |      |         |     |        |    |       |    |     |     |         |     |     |       |
|-------------------|----------------------------------------------------------------------------------------------------------------------------------------------------------------------------------------------------------------------------------------------------------------------------------------------|------|---------|-----|--------|----|-------|----|-----|-----|---------|-----|-----|-------|
| Zemlickova (2006) | Characteristics of <i>Streptococcus pneumoniae</i> , <i>Haemophilus influenzae</i> , <i>Moraxella catarrhalis</i> and <i>Staphylococcus aureus</i> isolated from the nasopharynx of healthy children attending day-care centres in the Czech Republic. <i>Epidemiology and Infection</i> 134 | 2004 | Czechia | 203 | Europe | CS | Unkn. | No | <5y | 3-6 | Unknown | 162 | 425 | 38%   |
| Zemlickova (2010) | Serotype-specific invasive disease potential of <i>Streptococcus pneumoniae</i> in Czech children. <i>Journal of Medical Microbiology</i> 59 (Pt 9)                                                                                                                                          | 2004 | Czechia | 203 | Europe | CS | Unkn. | No | <5y | 0-5 | Unknown | 138 |     | Unkn. |
